# Supplementary material for: Nests of red wood ants ( Formica rufa -group) are positively associated with tectonic faults: a double-blind test
Source: PeerJ journal article supplement (doi:10.7717/peerj.3903), 2017-10-12
Supplement: RWA_Supplementary_08_30_17.pdf [file RWA_Supplementary_08_30_17.pdf]

# Ants and Faults Analyses

AME & IDT & RRR

August 30, 2017

This is the reproducible code for analyses and figures: Make sure you have a reliable internet connection to download some of the spatial data needed for mapping.

Load required libraries and setwd

```
library(raster)

## Loading required package: sp

## Warning: package 'sp' was built under R version 3.4.1

library(rgdal)

## Warning: package 'rgdal' was built under R version 3.4.1

## rgdal: version: 1.2-8, (SVN revision 663)
## Geospatial Data Abstraction Library extensions to R successfully loaded
## Loaded GDAL runtime: GDAL 2.1.3, released 2017/20/01
## Path to GDAL shared files:
## /Library/Frameworks/R.framework/Versions/3.4/Resources/library/rgdal/gdal
## Loaded PROJ.4 runtime: Rel. 4.9.3, 15 August 2016, [PJ_VERSION: 493]
## Path to PROJ.4 shared files:
## /Library/Frameworks/R.framework/Versions/3.4/Resources/library/rgdal/proj
## Linking to sp version: 1.2-4

library(ggplot2)
library(ggmap)
library(reshape2)
library(plyr)
library(gridExtra)
library(spatstat)

## Warning: package 'spatstat' was built under R version 3.4.1

## Loading required package: nlme

##
## Attaching package: 'nlme'

## The following object is masked from 'package:raster':
##
##   getData

## Loading required package: rpart
```

```
##
## spatstat 1.52-1      (nickname: 'Apophenia')
## For an introduction to spatstat, type 'beginner'

##
## Attaching package: 'spatstat'

## The following objects are masked from 'package:raster':
##
##   area, rotate, shift

setwd("/Users/israel/Desktop/OneDrive - Lawrence University/DK Ants")
```

Read in data

```
dk.ants <- read.csv("DK_RWAnts.csv") #this reads in the data and assigns it to "dk.ants"
dk.faults <- read.csv("Faults_10_26.csv", header=T) #this is the file for geological faults
summary(dk.faults)
```

```
##      Id      x_start      y_start      x_end
## Min.   :0      Min.   : 7.711      Min.   :55.43      Min.   : 7.635
## 1st Qu.:0      1st Qu.: 8.552      1st Qu.:56.41      1st Qu.: 8.583
## Median :0      Median : 8.969      Median :56.77      Median : 9.013
## Mean   :0      Mean   : 9.071      Mean   :56.74      Mean   : 9.106
## 3rd Qu.:0      3rd Qu.: 9.483      3rd Qu.:57.07      3rd Qu.: 9.529
## Max.   :0      Max.   :10.973      Max.   :57.90      Max.   :10.950
##
##      y_end      Fault_Type      Fault_Age      Fault_Tren
## Min.   :55.44      Fault      :215      Pre-Quaternary: 38      NW-SE      :228
## 1st Qu.:56.40      Major Fault :238      NA's          :564      WNW-ESE:140
## Median :56.74      Normal Fault:149
## Mean   :56.73
## 3rd Qu.:57.05
## Max.   :57.90
##
##      Direction      Author
## Min.   :-348.8      2015 GEUS Server      :179
## 1st Qu.:-326.2      2010 Pedersen-Gravensen      : 54
## Median :-326.2      2010 Pedersen Gravesen      : 38
## Mean   :-261.6      1997 Veijbaek/2008 Petersen et al.: 1
## 3rd Qu.: -303.8      1998 Veijbaek/2008 Petersen et al.: 1
## Max.   : 0.0      1999 Veijbaek/2008 Petersen et al.: 1
##      (Other)      :328
```

So now we have two data files, dk.ants with locations and species of ants, and dk.faults with start and endpoints of each fault

Let's start with some simple plotting: We can plot the detailed distribution of RWA nests and absence points for each of the two study regions

```
## Map from URL : http://tile.stamen.com/toner/10/535/312.png
## Map from URL : http://tile.stamen.com/toner/10/536/312.png
## Map from URL : http://tile.stamen.com/toner/10/537/312.png
## Map from URL : http://tile.stamen.com/toner/10/535/313.png
## Map from URL : http://tile.stamen.com/toner/10/536/313.png
## Map from URL : http://tile.stamen.com/toner/10/537/313.png
## Map from URL : http://tile.stamen.com/toner/10/535/314.png
## Map from URL : http://tile.stamen.com/toner/10/536/314.png
## Map from URL : http://tile.stamen.com/toner/10/537/314.png
```

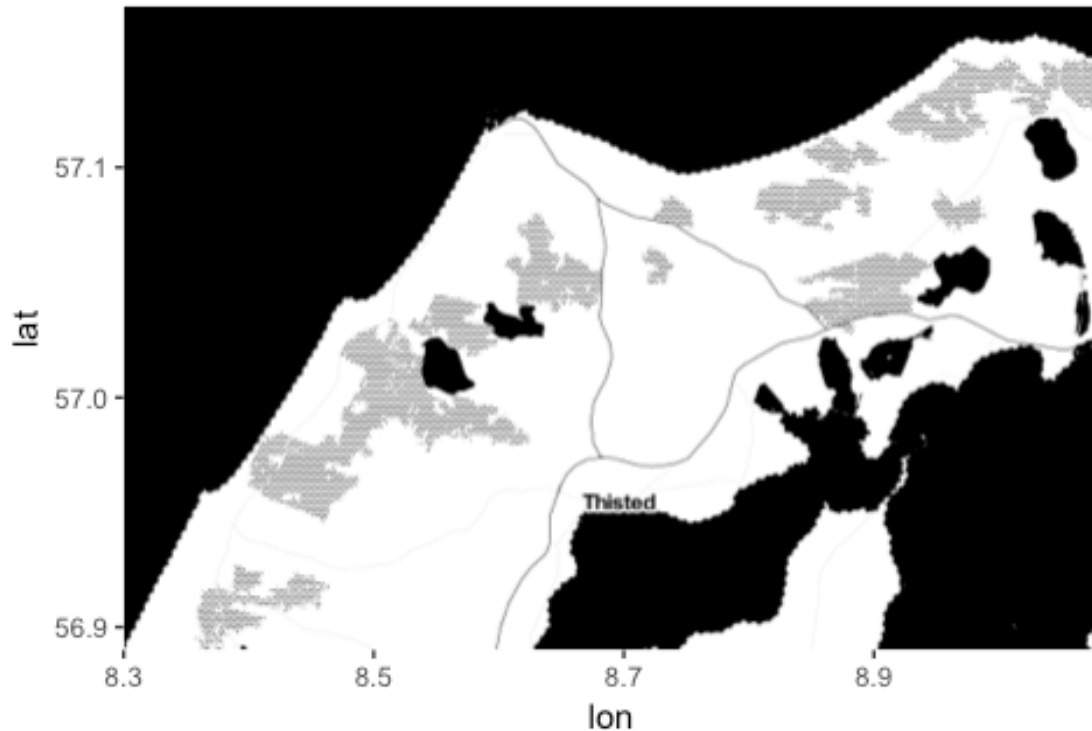

```
## Map from URL : http://tile.stamen.com/toner/10/535/315.png
## Map from URL : http://tile.stamen.com/toner/10/536/315.png
## Map from URL : http://tile.stamen.com/toner/10/535/316.png
## Map from URL : http://tile.stamen.com/toner/10/536/316.png
```

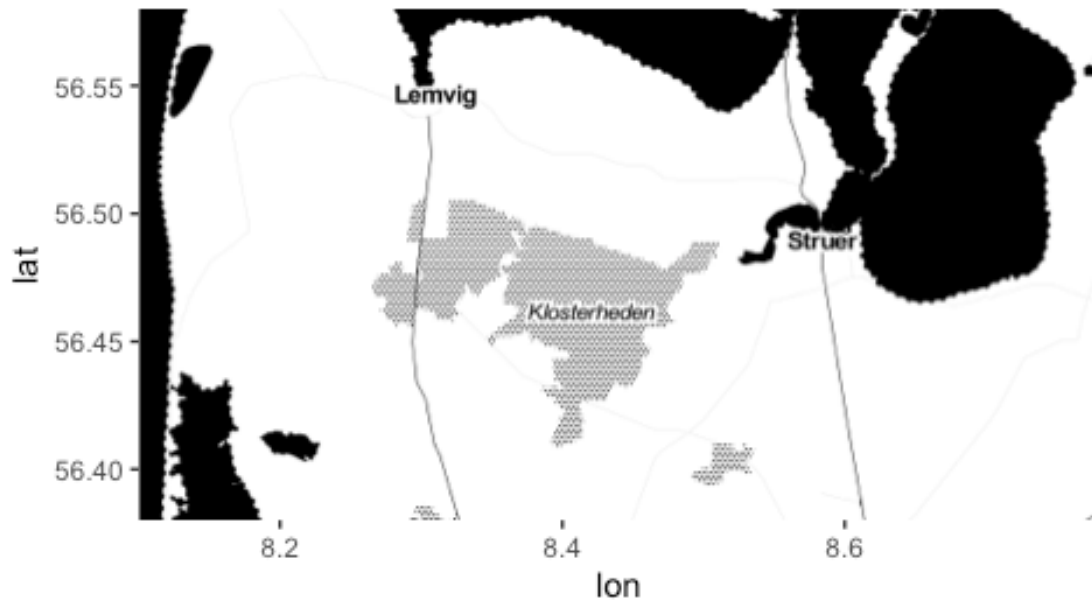

```
## Warning: Removed 87 rows containing missing values (geom_point).
```

```
## Warning: Removed 211 rows containing missing values (geom_point).
```

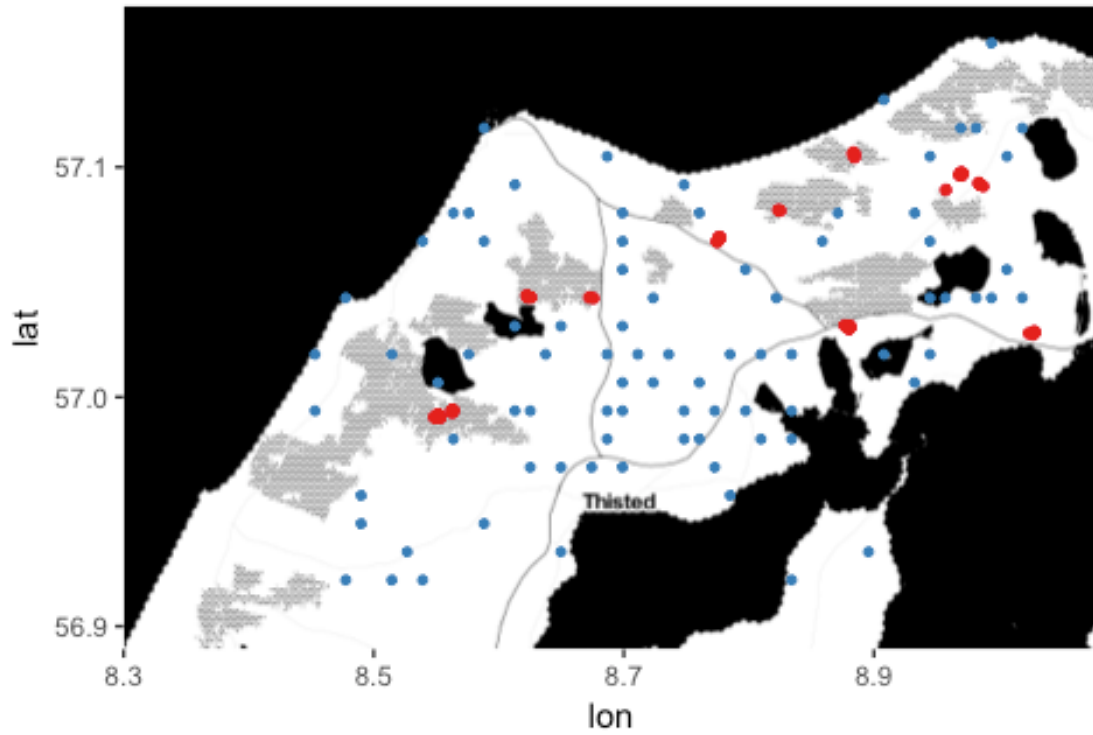

```
## Warning: Removed 84 rows containing missing values (geom_point).
```

```
## Warning: Removed 71 rows containing missing values (geom_point).
```

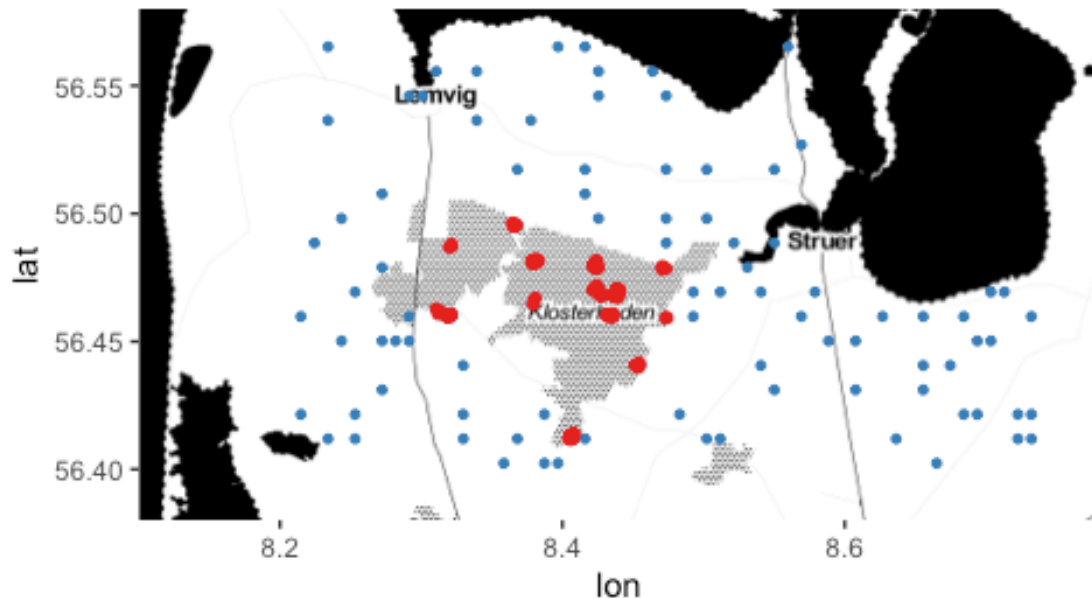

We can also map the distribution of the faults in the entire Jutland Peninsula

```
#study region boud.box= xmin=8.115, xmax=9.129, ymin=56.3, ymax=57.25
region_base = get_map(location=c( 8.05, 55, 11, 58), maptype="toner-
background")

## maptype = "toner-background" is only available with source = "stamen".
## resetting to source = "stamen"...
## Map from URL : http://tile.stamen.com/toner-background/8/133/77.png
## Map from URL : http://tile.stamen.com/toner-background/8/134/77.png
## Map from URL : http://tile.stamen.com/toner-background/8/135/77.png
## Map from URL : http://tile.stamen.com/toner-background/8/133/78.png
## Map from URL : http://tile.stamen.com/toner-background/8/134/78.png
## Map from URL : http://tile.stamen.com/toner-background/8/135/78.png
## Map from URL : http://tile.stamen.com/toner-background/8/133/79.png
## Map from URL : http://tile.stamen.com/toner-background/8/134/79.png
```

```

## Map from URL : http://tile.stamen.com/toner-background/8/135/79.png
## Map from URL : http://tile.stamen.com/toner-background/8/133/80.png
## Map from URL : http://tile.stamen.com/toner-background/8/134/80.png
## Map from URL : http://tile.stamen.com/toner-background/8/135/80.png

map3<-ggmap(region_base)
map3<- map3 + geom_point(data=abs_pts, aes(x=x, y=y), cex=1, col="#377eb8",
alpha=0.5 ) +
  geom_point(data=ant_pts, aes(x=x, y=y), cex=1, col="#e41a1c", alpha=0.5 )
+
  geom_segment(aes(x = x_start, y = y_start, xend = x_end, yend = y_end),
data = dk.faults,
              color= "#756bb1", cex=.75)
map3
## Warning: Removed 37 rows containing missing values (geom_segment).

```

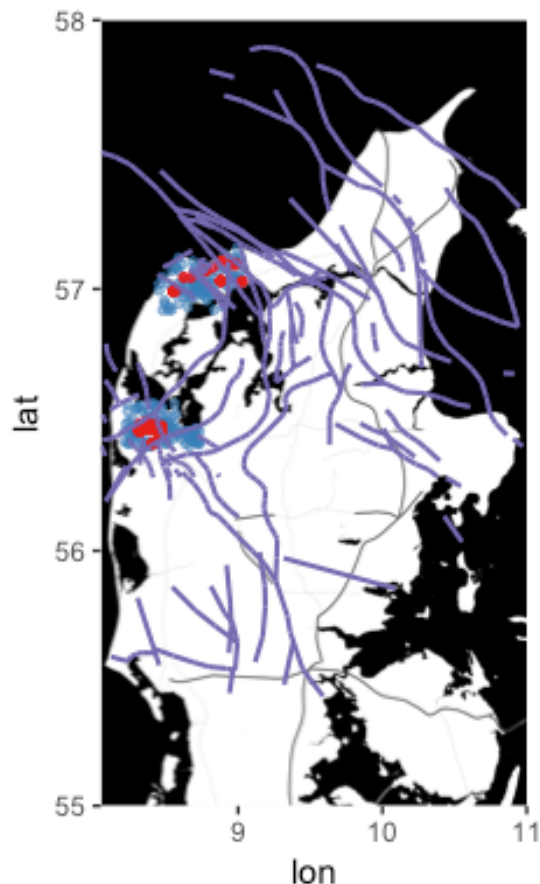

Now we can test for spatial clustering of the RWA nest points in both of the study region: The extent of the fault dataset is much larger than the extent of the ant data. And the ant data come in two widely separated clusters. So let's make some subsets to work with.

We could read off the graph, or subset by hand, or... but all of those are tedious. Let's use some of the facilities within spatstat instead.

```
#Start by identifying the extent ("window") of the ant data
dk.owin.ants <- owin(c(min(dk.ants$x)-.05, max(dk.ants$x)+.05),
c(min(dk.ants$y)-.05, max(dk.ants$y)+.05) )

#create a "point pattern object" out of dk.ants
dk.ppp.ants <- ppp(dk.ants$x, dk.ants$y, window=dk.owin.ants,
marks=dk.ants$SP_ID)

#now creat a "point segment object" out of dk.faults
dk.owin.faults <- owin(c(min(dk.faults$x_start, dk.faults$x_end),
max(dk.faults$x_start, dk.faults$x_end)), c(min(dk.faults$y_start,
dk.faults$y_end), max(dk.faults$y_start, dk.faults$y_end)))

dk.psp.faults <- psp(dk.faults$x_start, dk.faults$y_start, dk.faults$x_end,
dk.faults$y_end, window=dk.owin.faults)

dk.psp.faults.1 <- dk.psp.faults[dk.owin.ants]
```

So now we have two spatial data files that we can work with: dk.ppp.ants and dk.psp.faults.1

```
str(dk.ppp.ants)

## List of 6
## $ window      :List of 4
## ..$ type      : chr "rectangle"
## ..$ xrange:   num [1:2] 8.16 9.08
## ..$ yrange:   num [1:2] 56.4 57.2
## ..$ units     :List of 3
## .. ..$ singular : chr "unit"
## .. ..$ plural   : chr "units"
## .. ..$ multiplier: num 1
## .. ..- attr(*, "class")= chr "units"
## ..- attr(*, "class")= chr "owin"
## $ n           : int 453
## $ x           : num [1:453] 8.21 8.21 8.22 8.23 8.23 ...
## $ y           : num [1:453] 56.5 56.4 56.5 56.6 56.5 ...
## $ markformat: chr "vector"
## $ marks       : Factor w/ 6 levels "", "fusca", "none", ...: 3 3 3 3 3 3 3 3 3
## - attr(*, "class")= chr "ppp"

str(dk.psp.faults.1)

## List of 4
## $ ends        :'data.frame': 187 obs. of 4 variables:
## ..$ x0: num [1:187] 8.37 8.54 8.81 8.48 8.72 ...
## ..$ y0: num [1:187] 56.6 56.4 56.4 57.1 57.1 ...
```



```

## ..$ x1: num [1:187] 8.38 8.56 8.85 8.53 8.71 ...
## ..$ y1: num [1:187] 56.5 56.4 56.4 57.1 57.1 ...
## $ window :List of 4
## ..$ type : chr "rectangle"
## ..$ xrange: num [1:2] 8.16 9.08
## ..$ yrange: num [1:2] 56.4 57.2
## ..$ units :List of 3
## .. ..$ singular : chr "unit"
## .. ..$ plural : chr "units"
## .. ..$ multiplier: num 1
## .. ..- attr(*, "class")= chr "units"
## ..- attr(*, "class")= chr "owin"
## $ n : int 187
## $ markformat: chr "none"
## - attr(*, "class")= chr [1:2] "psp" "list"

```

*#Are ants randomly distributed?*

```
Kest(dk.ppp.ants[dk.ppp.ants$marks != "none"])
```

```

## Function value object (class 'fv')
## for the function r -> K(r)
## .....
##      Math.label      Description
## r      r            distance argument r
## theo   K[pois](r)   theoretical Poisson K(r)
## border hat(K)[bord](r) border-corrected estimate of K(r)
## trans  hat(K)[trans](r) translation-corrected estimate of K(r)
## iso    hat(K)[iso](r) isotropic-corrected estimate of K(r)
## .....
## Default plot formula: .~r
## where "." stands for 'iso', 'trans', 'border', 'theo'
## Recommended range of argument r: [0, 0.21288]
## Available range of argument r: [0, 0.21288]

```

```
plot(Kest(dk.ppp.ants[dk.ppp.ants$marks != "none"])) #also illustrates nested functions
```

**Kest(dk.ppp.ants[dk.ppp.ants\$marks != "none"])**

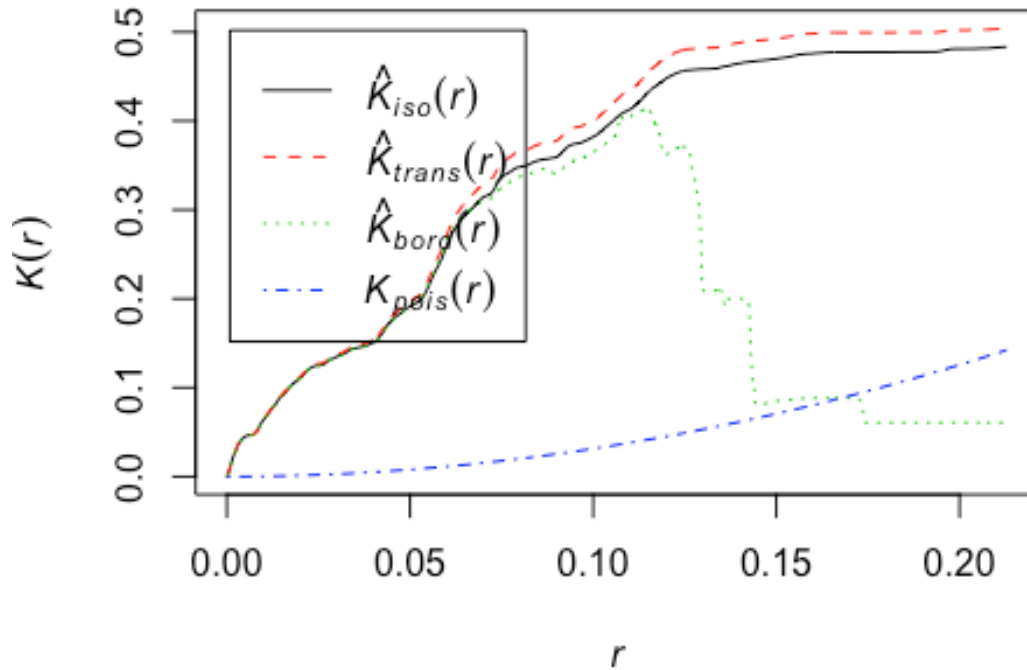

```
plot(envelope(dk.ppp.ants[dk.ppp.ants$marks != "none"], fun=Kest, nsim=99))
```

```
## Generating 99 simulations of CSR ...  
## 1, 2, 3, 4, 5, 6, 7, 8, 9, 10, 11, 12, 13, 14, 15, 16, 17, 18, 19, 20, 21,  
## 22, 23, 24, 25, 26, 27, 28, 29, 30, 31, 32, 33, 34, 35, 36, 37, 38,  
## 39, 40, 41, 42, 43, 44, 45, 46, 47, 48, 49, 50, 51, 52, 53, 54, 55, 56,  
## 57, 58, 59, 60, 61, 62, 63, 64, 65, 66, 67, 68, 69, 70, 71, 72, 73, 74, 75,  
## 76,  
## 77, 78, 79, 80, 81, 82, 83, 84, 85, 86, 87, 88, 89, 90, 91, 92, 93, 94,  
## 95, 96, 97, 98, 99.  
##  
## Done.
```

```
slope(dk.ppp.ants[dk.ppp.ants$marks != "none"], fun
```

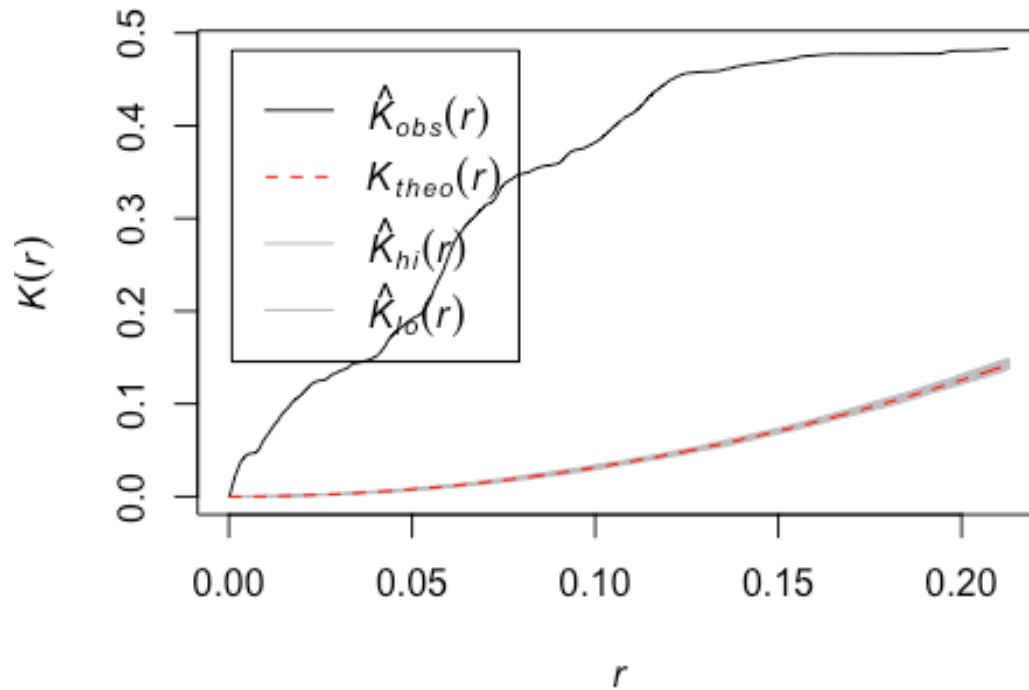

Aside: Ants are clumped, but is it because we have two clumps? Maybe we should just look at one clump?

```
#reminder What would a random pattern look like?
```

```
nX <- npoints(dk.ppp.ants[dk.ppp.ants$marks != "none"]) #same number of points as ants
```

```
nX
```

```
## [1] 282
```

```
PatList <- runifpoint(nX) #generates using runifpoint function, maintains owin
```

```
plot(PatList)
```

## PatList

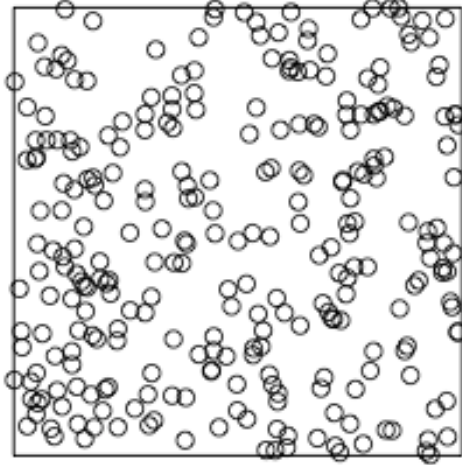

```
plot(envelope(PatList, fun=Kest, nsim=99))
```

```
## Generating 99 simulations of CSR ...  
## 1, 2, 3, 4, 5, 6, 7, 8, 9, 10, 11, 12, 13, 14, 15, 16, 17, 18, 19, 20, 21,  
22, 23, 24, 25, 26, 27, 28, 29, 30, 31, 32, 33, 34, 35, 36, 37, 38,  
## 39, 40, 41, 42, 43, 44, 45, 46, 47, 48, 49, 50, 51, 52, 53, 54, 55, 56,  
57, 58, 59, 60, 61, 62, 63, 64, 65, 66, 67, 68, 69, 70, 71, 72, 73, 74, 75,  
76,  
## 77, 78, 79, 80, 81, 82, 83, 84, 85, 86, 87, 88, 89, 90, 91, 92, 93, 94,  
95, 96, 97, 98, 99.  
##  
## Done.
```

**envelope(PatList, fun = Kest, nsim = 99)**

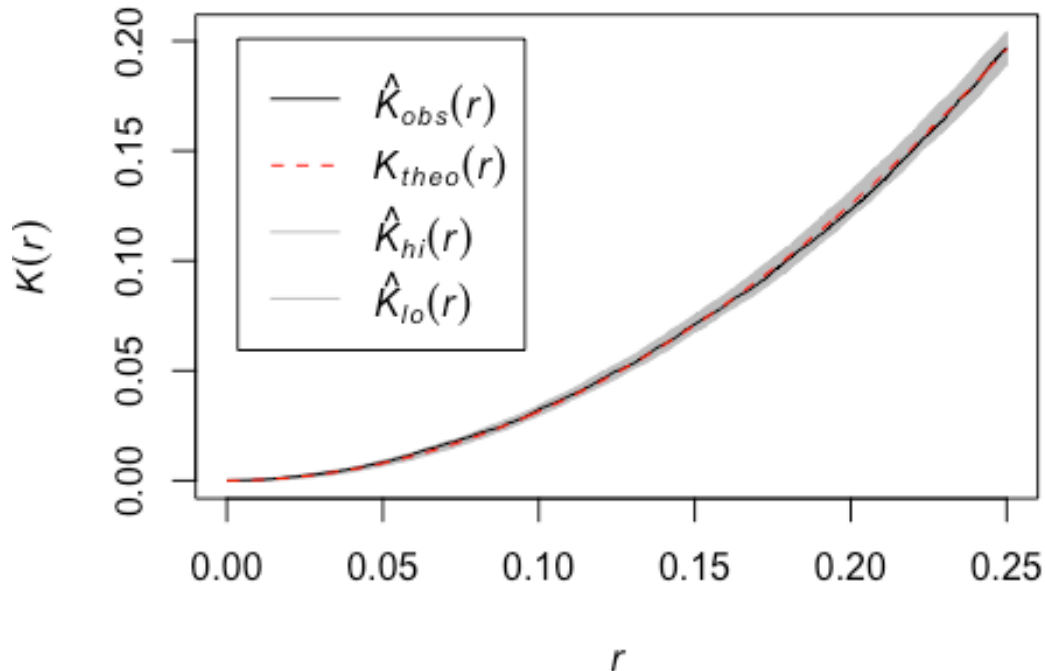

```
par(mfrow=c(1,2))
plot(envelope(dk.ppp.ants[dk.ppp.ants$marks != "none"], fun=Kest, nsim=99),
main="ants")

## Generating 99 simulations of CSR ...
## 1, 2, 3, 4, 5, 6, 7, 8, 9, 10, 11, 12, 13, 14, 15, 16, 17, 18, 19, 20, 21,
## 22, 23, 24, 25, 26, 27, 28, 29, 30, 31, 32, 33, 34, 35, 36, 37, 38,
## 39, 40, 41, 42, 43, 44, 45, 46, 47, 48, 49, 50, 51, 52, 53, 54, 55, 56,
## 57, 58, 59, 60, 61, 62, 63, 64, 65, 66, 67, 68, 69, 70, 71, 72, 73, 74, 75,
## 76,
## 77, 78, 79, 80, 81, 82, 83, 84, 85, 86, 87, 88, 89, 90, 91, 92, 93, 94,
## 95, 96, 97, 98, 99.
##
## Done.

plot(envelope(rpoispp(273), fun=Kest, nsim=99), main="Poisson")

## Generating 99 simulations of CSR ...
## 1, 2, 3, 4, 5, 6, 7, 8, 9, 10, 11, 12, 13, 14, 15, 16, 17, 18, 19, 20, 21,
## 22, 23, 24, 25, 26, 27, 28, 29, 30, 31, 32, 33, 34, 35, 36, 37, 38,
## 39, 40, 41, 42, 43, 44, 45, 46, 47, 48, 49, 50, 51, 52, 53, 54, 55, 56,
## 57, 58, 59, 60, 61, 62, 63, 64, 65, 66, 67, 68, 69, 70, 71, 72, 73, 74, 75,
## 76,
## 77, 78, 79, 80, 81, 82, 83, 84, 85, 86, 87, 88, 89, 90, 91, 92, 93, 94,
```

95, 96, 97, 98, 99.

##

## Done.

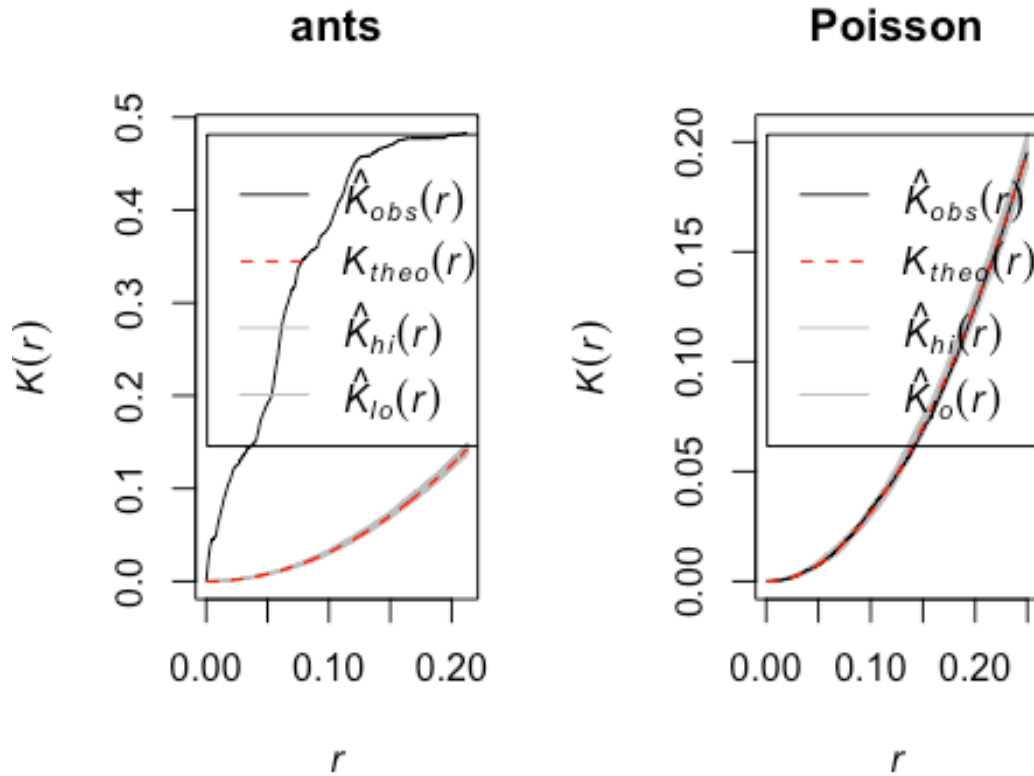

*#smaller ant subset*

*#one way to identify groups*

```
plot(dk.ants$x, dk.ants$y)
```

```
hist(dk.ants$y)
```

## Histogram of dk.ants\$y

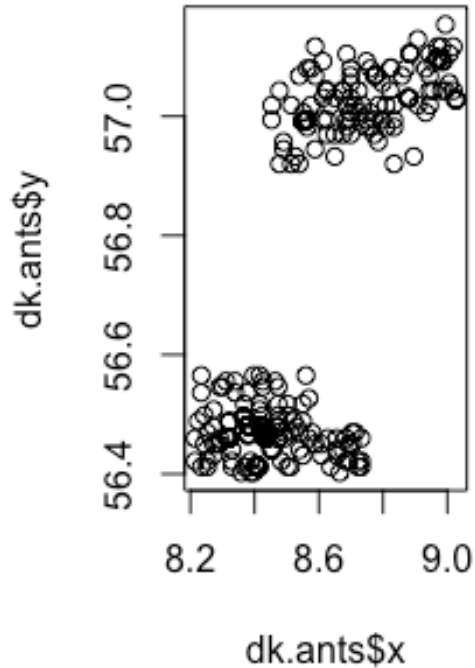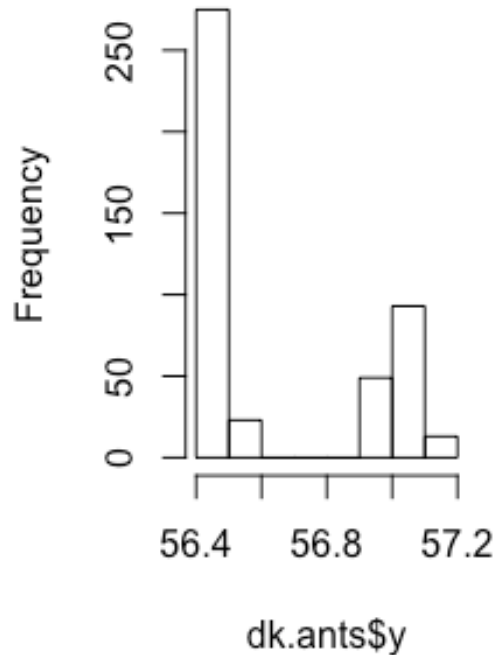

```
#clip it
str(dk.owin.ants)

## List of 4
## $ type : chr "rectangle"
## $ xrange: num [1:2] 8.16 9.08
## $ yrange: num [1:2] 56.4 57.2
## $ units :List of 3
## ..$ singular : chr "unit"
## ..$ plural : chr "units"
## ..$ multiplier: num 1
## ..- attr(*, "class")= chr "units"
## - attr(*, "class")= chr "owin"

dk.owin.ants.2 <- dk.owin.ants

#Thy clump
dk.owin.ants.2$yrange <- c(56.8, 57.2)
dk.owin.ants.2$xrange <-c(8.4, 9.08)

#Klosterhede clump
dk.owin.ants.2$yrange <- c(56.34, 56.6)
dk.owin.ants.2$xrange <-c(8.16, 8.8)
```

```

dk.ppp.ants.2 <- dk.ppp.ants[dk.owin.ants.2]
dk.psp.faults.2 <- dk.psp.faults.1[dk.owin.ants.2]

#plot it
par(mfrow=c(1,1))
plot(dk.psp.faults.2)
plot(dk.ppp.ants.2[dk.ppp.ants.2$marks == "none"], col="black", pch=1,
add=TRUE)
plot(unmark(dk.ppp.ants.2[dk.ppp.ants.2$marks != "none"]), col="red", pch=1,
add=TRUE)

```

## dk.psp.faults.2

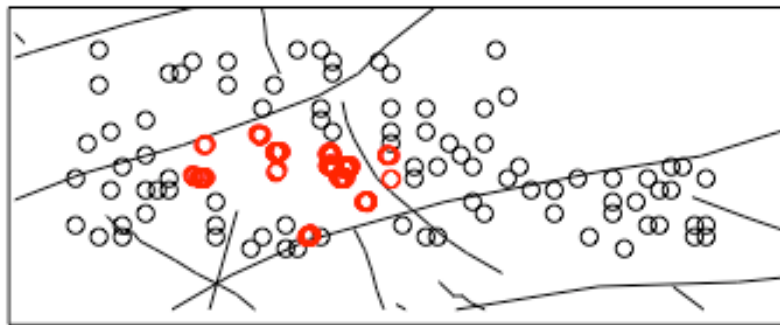

```

#test it
par(mfrow=c(1,2))
plot(envelope(dk.ppp.ants.2[dk.ppp.ants.2$marks != "none"], fun=Kest,
nsim=99), main="ants")

## Generating 99 simulations of CSR ...
## 1, 2, 3, 4, 5, 6, 7, 8, 9, 10, 11, 12, 13, 14, 15, 16, 17, 18, 19, 20, 21,
## 22, 23, 24, 25, 26, 27, 28, 29, 30, 31, 32, 33, 34, 35, 36, 37, 38,
## 39, 40, 41, 42, 43, 44, 45, 46, 47, 48, 49, 50, 51, 52, 53, 54, 55, 56,
## 57, 58, 59, 60, 61, 62, 63, 64, 65, 66, 67, 68, 69, 70, 71, 72, 73, 74, 75,
## 76,

```



```

## 77, 78, 79, 80, 81, 82, 83, 84, 85, 86, 87, 88, 89, 90, 91, 92, 93, 94,
95, 96, 97, 98, 99.
##
## Done.

plot(envelope(dk.ppp.ants.2[dk.ppp.ants.2$marks == "none"], fun=Kest,
nsim=99), main="no ants")

## Generating 99 simulations of CSR ...
## 1, 2, 3, 4, 5, 6, 7, 8, 9, 10, 11, 12, 13, 14, 15, 16, 17, 18, 19, 20, 21,
22, 23, 24, 25, 26, 27, 28, 29, 30, 31, 32, 33, 34, 35, 36, 37, 38,
## 39, 40, 41, 42, 43, 44, 45, 46, 47, 48, 49, 50, 51, 52, 53, 54, 55, 56,
57, 58, 59, 60, 61, 62, 63, 64, 65, 66, 67, 68, 69, 70, 71, 72, 73, 74, 75,
76,
## 77, 78, 79, 80, 81, 82, 83, 84, 85, 86, 87, 88, 89, 90, 91, 92, 93, 94,
95, 96, 97, 98, 99.
##
## Done.

```

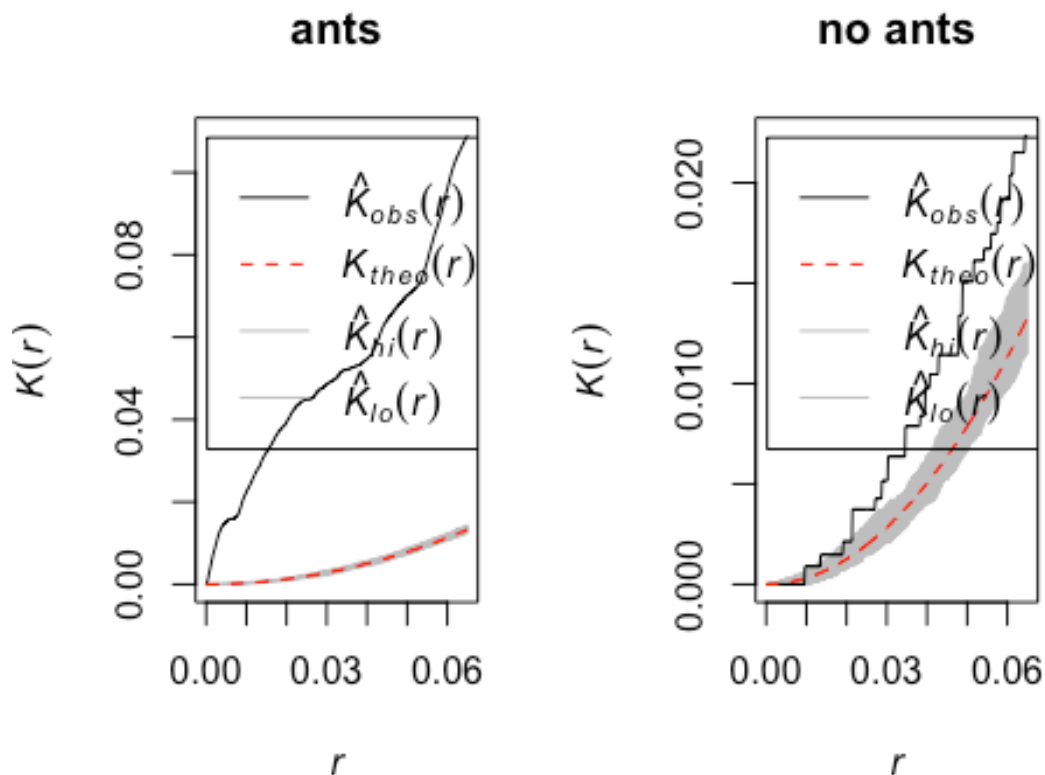

last but not least, let's look at relationships between ants and faults

```

dk.ppp.ants.2a <- unmark(dk.ppp.ants.2[dk.ppp.ants.2$marks != "none"])
dk.ppp.ants.2na <- unmark(dk.ppp.ants.2[dk.ppp.ants.2$marks == "none"])

```

```
par(mfrow=c(1,1))
plot(dk.ppp.ants.2a, pch=16, main="Danish ants")
plot(dk.psp.faults.2, add=TRUE)
```

## Danish ants

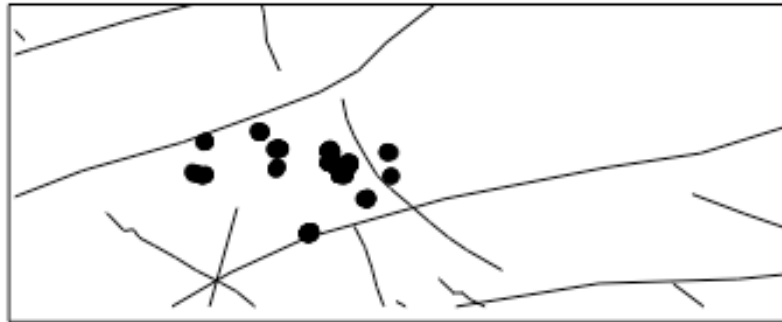

*#Let's get turn faults into a covariate that is a function of spatial location. A reasonable first step is the distance from any point to a fault.*

```
cov.faults <- distmap(dk.psp.faults.2)
plot(dk.psp.faults.2, lwd=2, man="")
contour(cov.faults, add=TRUE)
```

## dk.psp.faults.2

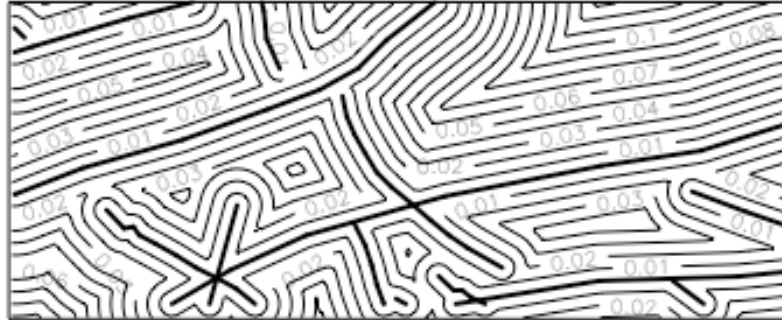

```
#relative distribution of ants to faults
#We examine how intensity of the point process (ants, no ants) varies as a
function rho of the covariate
#Because the pattern is inhomogeneous, we use a kernel smoother
tiff("Fig2AB.tiff", height = 4, width = 8, units="in", res=600)
par(mfrow=c(1,2))
plot(rhohat(dk.ppp.ants.2a, cov.faults), xlab="Distance to nearest fault",
ylim=c(0,5000), xlim=c(0,.12), main="ant mounds", col= "#e41a1c", lwd=2,
legend=F)

plot(rhohat(dk.ppp.ants.2na, cov.faults), xlab="Distance to nearest fault",
ylim=c(0,5000), xlim=c(0,.12), main="no ants", col="#377eb8", lwd=2, legend=F
)

dev.off()

## quartz_off_screen
##                2

#test it....
rho.ants <- rhohat(dk.ppp.ants.2a, cov.faults)
rho.no.ants <- rhohat(dk.ppp.ants.2na, cov.faults)
ks.test(rho.ants$rho, rho.no.ants$rho)
```



```

#Start by identifying the extent ("window") of the ant data
dk.owin.ants <- owin(c(min(dk.ants$x)-.05, max(dk.ants$x)+.05),
c(min(dk.ants$y)-.05, max(dk.ants$y)+.05) )

#create a "point pattern object" out of dk.ants
dk.ppp.ants <- ppp(dk.ants$x, dk.ants$y, window=dk.owin.ants,
marks=dk.ants$SP_ID)

#now creat a "point segment object" out of dk.faults
dk.owin.faults <- owin(c(min(dk.faults$x_start, dk.faults$x_end),
max(dk.faults$x_start, dk.faults$x_end)), c(min(dk.faults$y_start,
dk.faults$y_end), max(dk.faults$y_start, dk.faults$y_end)))

dk.psp.faults <- psp(dk.faults$x_start, dk.faults$y_start, dk.faults$x_end,
dk.faults$y_end, window=dk.owin.faults)

dk.psp.faults.1 <- dk.psp.faults[dk.owin.ants]

str(dk.ppp.ants)

## List of 6
## $ window :List of 4
## ..$ type : chr "rectangle"
## ..$ xrange: num [1:2] 8.16 9.08
## ..$ yrange: num [1:2] 56.4 57.2
## ..$ units :List of 3
## .. ..$ singular : chr "unit"
## .. ..$ plural : chr "units"
## .. ..$ multiplier: num 1
## .. ..- attr(*, "class")= chr "units"
## ..- attr(*, "class")= chr "owin"
## $ n : int 453
## $ x : num [1:453] 8.21 8.21 8.22 8.23 8.23 ...
## $ y : num [1:453] 56.5 56.4 56.5 56.6 56.5 ...
## $ markformat: chr "vector"
## $ marks : Factor w/ 6 levels "", "fusca", "none", ...: 3 3 3 3 3 3 3 3 3
3 ...
## - attr(*, "class")= chr "ppp"

str(dk.psp.faults.1)

## List of 4
## $ ends :'data.frame': 66 obs. of 4 variables:
## ..$ x0: num [1:66] 8.54 9.03 9 8.97 8.93 ...
## ..$ y0: num [1:66] 56.4 57 57 57 57.1 ...
## ..$ x1: num [1:66] 8.56 9.06 9.03 9 8.97 ...
## ..$ y1: num [1:66] 56.4 57 57 57 57 ...
## $ window :List of 4
## ..$ type : chr "rectangle"
## ..$ xrange: num [1:2] 8.16 9.08

```

```

## ..$ yrange: num [1:2] 56.4 57.2
## ..$ units :List of 3
## .. ..$ singular : chr "unit"
## .. ..$ plural : chr "units"
## .. ..$ multiplier: num 1
## .. ..- attr(*, "class")= chr "units"
## ..- attr(*, "class")= chr "owin"
## $ n : int 66
## $ markformat: chr "none"
## - attr(*, "class")= chr [1:2] "psp" "list"

```

```

#clip it
str(dk.owin.ants)

```

```

## List of 4
## $ type : chr "rectangle"
## $ xrange: num [1:2] 8.16 9.08
## $ yrange: num [1:2] 56.4 57.2
## $ units :List of 3
## ..$ singular : chr "unit"
## ..$ plural : chr "units"
## ..$ multiplier: num 1
## ..- attr(*, "class")= chr "units"
## - attr(*, "class")= chr "owin"

```

```

dk.owin.ants.2 <- dk.owin.ants

```

```

#Thy clump
dk.owin.ants$yrange <- c(56.8, 57.2)
dk.owin.ants$xrange <-c(8.4, 9.08)

```

```

#Klosterhede clump
dk.owin.ants.2$yrange <- c(56.34, 56.6)
dk.owin.ants.2$xrange <-c(8.16, 8.8)

```

```

dk.ppp.ants.2 <- dk.ppp.ants[dk.owin.ants.2]
dk.psp.faults.2 <- dk.psp.faults.1[dk.owin.ants.2]

```

```

dk.ppp.ants.2a <-unmark(dk.ppp.ants.2[dk.ppp.ants.2$marks != "none"])

```

```

dk.ppp.ants.2na <-unmark(dk.ppp.ants.2[dk.ppp.ants.2$marks == "none"])

```

*#Let's get turn faults into a covariate that is a function of spatial location. A reasonable first step is the distance from any point to a fault.*

```

cov.faults <- distmap(dk.psp.faults.2)

```

*#relative distribution of ants to faults*  
*#We examine how intensity of the point process (ants, no ants) varies as a function rho of the covariate*

```

#Because the pattern is inhomogeneous, we use a kernel smoother

plot(rhohat(dk.ppp.ants.2a, cov.faults), xlab="Distance to nearest fault",
ylim=c(0,11500), xlim=c(0,.12), main="NW-SE", col= "#e41a1c", lwd=2,
legend=F)

#test it....
rho.ants <- rhohat(dk.ppp.ants.2a, cov.faults)
rho.no.ants <- rhohat(dk.ppp.ants.2na, cov.faults)
ks.test(rho.ants$rho, rho.no.ants$rho)

## Warning in ks.test(rho.ants$rho, rho.no.ants$rho): p-value will be
## approximate in the presence of ties

##
## Two-sample Kolmogorov-Smirnov test
##
## data: rho.ants$rho and rho.no.ants$rho
## D = 0.42188, p-value < 2.2e-16
## alternative hypothesis: two-sided

#test it....
rho.ants <- rhohat(dk.ppp.ants.2a, cov.faults)
rho.no.ants <- rhohat(dk.ppp.ants.2na, cov.faults)
ks.test(rho.ants$rho, rho.no.ants$rho)

## Warning in ks.test(rho.ants$rho, rho.no.ants$rho): p-value will be
## approximate in the presence of ties

##
## Two-sample Kolmogorov-Smirnov test
##
## data: rho.ants$rho and rho.no.ants$rho
## D = 0.42188, p-value < 2.2e-16
## alternative hypothesis: two-sided

#strong association between normal faults and ant occurances. Ranging from 4
to 10 m from a normal fault

#strong association between normal faults and ant occurances. Ranging from 4
to 10 m from a normal fault
dk.faults <- read.csv("Faults_10_26.csv", header=T) #this is the file for
geological faults
summary (dk.faults)

##      Id      x_start      y_start      x_end
## Min.   :0      Min.   : 7.711      Min.   :55.43      Min.   : 7.635
## 1st Qu.:0      1st Qu.: 8.552      1st Qu.:56.41      1st Qu.: 8.583
## Median :0      Median : 8.969      Median :56.77      Median : 9.013
## Mean   :0      Mean   : 9.071      Mean   :56.74      Mean   : 9.106
## 3rd Qu.:0      3rd Qu.: 9.483      3rd Qu.:57.07      3rd Qu.: 9.529

```

```

## Max. :0 Max. :10.973 Max. :57.90 Max. :10.950
##
## y_end Fault_Type Fault_Age Fault_Tren
## Min. :55.44 Fault :215 Pre-Quaternary: 38 NW-SE :228
## 1st Qu.:56.40 Major Fault :238 NA's :564 WNW-ESE:140
## Median :56.74 Normal Fault:149 NNW-SSE: 93
## Mean :56.73 NE-SW : 88
## 3rd Qu.:57.05 NNE-SSW: 40
## Max. :57.90 ENE-WSW: 7
## (Other): 6
## Direction Author
## Min. :-348.8 2015 GEUS Server :179
## 1st Qu.: -326.2 2010 Pedersen-Gravensen : 54
## Median : -326.2 2010 Pedersen Gravesen : 38
## Mean : -261.6 1997 Veijbaek/2008 Petersen et al.: 1
## 3rd Qu.: -303.8 1998 Veijbaek/2008 Petersen et al.: 1
## Max. : 0.0 1999 Veijbaek/2008 Petersen et al.: 1
## (Other) :328

```

*#subset this dataset to include only normal faults*

```

dk.faults<-dk.faults[which(dk.faults$Fault_Tren == "NNW-SSE"),]
summary(dk.faults)

```

```

## Id x_start y_start x_end
## Min. :0 Min. : 7.820 Min. :55.67 Min. : 7.833
## 1st Qu.:0 1st Qu.: 8.474 1st Qu.:56.52 1st Qu.: 8.490
## Median :0 Median : 9.115 Median :56.83 Median : 9.129
## Mean :0 Mean : 9.075 Mean :56.74 Mean : 9.081
## 3rd Qu.:0 3rd Qu.: 9.369 3rd Qu.:57.00 3rd Qu.: 9.371
## Max. :0 Max. :10.307 Max. :57.47 Max. :10.290
##
## y_end Fault_Type Fault_Age Fault_Tren
## Min. :55.71 Fault :21 Pre-Quaternary: 0 NNW-SSE:93
## 1st Qu.:56.51 Major Fault :49 NA's :93 ENE-WSW: 0
## Median :56.79 Normal Fault:23 N-S : 0
## Mean :56.72 NE-SW : 0
## 3rd Qu.:56.97 NNE-SSW: 0
## Max. :57.41 NW_SE : 0
## (Other): 0
## Direction Author
## Min. :-348.8 2015 GEUS Server :49
## 1st Qu.: -348.8 2010 Pedersen-Gravensen : 7
## Median : -348.8 1997 Veijbaek/2008 Petersen et al.: 1
## Mean : -348.8 2017 Veijbaek/2008 Petersen et al.: 1
## 3rd Qu.: -348.8 2019 Veijbaek/2008 Petersen et al.: 1
## Max. : -348.8 2025 Veijbaek/2008 Petersen et al.: 1
## (Other) :33

```

*#Start by identifying the extent ("window") of the ant data*

```

dk.owin.ants <- owin(c(min(dk.ants$x)-.05, max(dk.ants$x)+.05),

```



```

c(min(dk.ants$y)-.05, max(dk.ants$y)+.05) )

#create a "point pattern object" out of dk.ants
dk.ppp.ants <- ppp(dk.ants$x, dk.ants$y, window=dk.owin.ants,
marks=dk.ants$SP_ID)

#now creat a "point segment object" out of dk.faults
dk.owin.faults <- owin(c(min(dk.faults$x_start, dk.faults$x_end),
max(dk.faults$x_start, dk.faults$x_end)), c(min(dk.faults$y_start,
dk.faults$y_end),      max(dk.faults$y_start, dk.faults$y_end)))

dk.psp.faults <- psp(dk.faults$x_start, dk.faults$y_start, dk.faults$x_end,
dk.faults$y_end, window=dk.owin.faults)

dk.psp.faults.1 <- dk.psp.faults[dk.owin.ants]

str(dk.ppp.ants)

## List of 6
## $ window      :List of 4
## ..$ type      : chr "rectangle"
## ..$ xrange:   num [1:2] 8.16 9.08
## ..$ yrange:   num [1:2] 56.4 57.2
## ..$ units     :List of 3
## .. ..$ singular : chr "unit"
## .. ..$ plural   : chr "units"
## .. ..$ multiplier: num 1
## .. ..- attr(*, "class")= chr "units"
## ..- attr(*, "class")= chr "owin"
## $ n           : int 453
## $ x           : num [1:453] 8.21 8.21 8.22 8.23 8.23 ...
## $ y           : num [1:453] 56.5 56.4 56.5 56.6 56.5 ...
## $ markformat: chr "vector"
## $ marks       : Factor w/ 6 levels "", "fusca", "none", ...: 3 3 3 3 3 3 3 3 3
3 ...
## - attr(*, "class")= chr "ppp"

str(dk.psp.faults.1)

## List of 4
## $ ends        :'data.frame': 34 obs. of 4 variables:
## ..$ x0: num [1:34] 8.37 9.02 9.02 9.02 9.03 ...
## ..$ y0: num [1:34] 56.6 57.2 57.2 57.1 57.1 ...
## ..$ x1: num [1:34] 8.38 9.02 9.02 9.03 9.03 ...
## ..$ y1: num [1:34] 56.5 57.2 57.1 57.1 57.1 ...
## $ window      :List of 4
## ..$ type      : chr "rectangle"
## ..$ xrange:   num [1:2] 8.16 9.08
## ..$ yrange:   num [1:2] 56.4 57.2
## ..$ units     :List of 3

```

```

## .. ..$ singular : chr "unit"
## .. ..$ plural   : chr "units"
## .. ..$ multiplier: num 1
## .. ..- attr(*, "class")= chr "units"
## ..- attr(*, "class")= chr "owin"
## $ n           : int 34
## $ markformat: chr "none"
## - attr(*, "class")= chr [1:2] "psp" "list"

```

```

#clip it
str(dk.owin.ants)

```

```

## List of 4
## $ type : chr "rectangle"
## $ xrange: num [1:2] 8.16 9.08
## $ yrange: num [1:2] 56.4 57.2
## $ units :List of 3
## ..$ singular : chr "unit"
## ..$ plural   : chr "units"
## ..$ multiplier: num 1
## ..- attr(*, "class")= chr "units"
## - attr(*, "class")= chr "owin"

```

```

dk.owin.ants.2 <- dk.owin.ants

```

```

#Thy clump

```

```

dk.owin.ants$yrange <- c(56.8, 57.2)
dk.owin.ants$xrange <-c(8.4, 9.08)

```

```

#Klosterhede clump

```

```

dk.owin.ants.2$yrange <- c(56.34, 56.6)
dk.owin.ants.2$xrange <-c(8.16, 8.8)

```

```

dk.ppp.ants.2 <- dk.ppp.ants[dk.owin.ants.2]
dk.psp.faults.2 <- dk.psp.faults.1[dk.owin.ants.2]

```

```

dk.ppp.ants.2a <-unmark(dk.ppp.ants.2[dk.ppp.ants.2$marks != "none"])

```

```

dk.ppp.ants.2na <-unmark(dk.ppp.ants.2[dk.ppp.ants.2$marks == "none"])

```

*#Let's get turn faults into a covariate that is a function of spatial location. A reasonable first step is the distance from any point to a fault.*

```

cov.faults <- distmap(dk.psp.faults.2)

```

```

#relative distribution of ants to faults

```

```

#We examine how intensity of the point process (ants, no ants) varies as a function rho of the covariate

```

```

#Because the pattern is inhomogeneous, we use a kernel smoother

```

```

plot(rhohat(dk.ppp.ants.2a, cov.faults), xlab="Distance to nearest fault",

```

```

ylim=c(0,11500), xlim=c(0,.12), main="NNW-SSE", col= "#e41a1c", lwd=2,
legend=F)

#test it....
rho.ants <- rhohat(dk.ppp.ants.2a, cov.faults)
rho.no.ants <- rhohat(dk.ppp.ants.2na, cov.faults)
ks.test(rho.ants$rho, rho.no.ants$rho)

## Warning in ks.test(rho.ants$rho, rho.no.ants$rho): p-value will be
## approximate in the presence of ties

##
## Two-sample Kolmogorov-Smirnov test
##
## data: rho.ants$rho and rho.no.ants$rho
## D = 0.59375, p-value < 2.2e-16
## alternative hypothesis: two-sided

#strong association between normal faults and ant occurances. Ranging from 4
to 10 m from a normal fault
dk.faults <- read.csv("Faults_10_26.csv", header=T) #this is the file for
geological faults
summary (dk.faults)

##      Id      x_start      y_start      x_end
## Min.   :0      Min.   : 7.711      Min.   :55.43      Min.   : 7.635
## 1st Qu.:0      1st Qu.: 8.552      1st Qu.:56.41      1st Qu.: 8.583
## Median :0      Median : 8.969      Median :56.77      Median : 9.013
## Mean   :0      Mean   : 9.071      Mean   :56.74      Mean   : 9.106
## 3rd Qu.:0      3rd Qu.: 9.483      3rd Qu.:57.07      3rd Qu.: 9.529
## Max.   :0      Max.   :10.973      Max.   :57.90      Max.   :10.950
##
##      y_end      Fault_Type      Fault_Age      Fault_Tren
## Min.   :55.44      Fault      :215      Pre-Quaternary: 38      NW-SE :228
## 1st Qu.:56.40      Major Fault :238      NA's          :564      WNW-ESE:140
## Median :56.74      Normal Fault:149
## Mean   :56.73
## 3rd Qu.:57.05
## Max.   :57.90
##
##      Direction      Author
## Min.   :-348.8      2015 GEUS Server      :179
## 1st Qu.: -326.2      2010 Pedersen-Gravensen      : 54
## Median :-326.2      2010 Pedersen Gravesen      : 38
## Mean   :-261.6      1997 Veijbaek/2008 Petersen et al.: 1
## 3rd Qu.: -303.8      1998 Veijbaek/2008 Petersen et al.: 1
## Max.   : 0.0      1999 Veijbaek/2008 Petersen et al.: 1
##      (Other)      :328

```

```
#subset this dataset to include only normal faults
```

```
dk.faults<-dk.faults[which(dk.faults$Fault_Tren =="NE-SW"),]  
summary(dk.faults)
```

```
##      Id      x_start      y_start      x_end  
## Min.   :0      Min.   :7.711      Min.   :55.48      Min.   :7.635  
## 1st Qu.:0      1st Qu.:8.261      1st Qu.:56.42      1st Qu.:8.301  
## Median :0      Median :8.690      Median :56.55      Median :8.696  
## Mean   :0      Mean   :8.668      Mean   :56.59      Mean   :8.697  
## 3rd Qu.:0      3rd Qu.:9.138      3rd Qu.:56.93      3rd Qu.:9.138  
## Max.   :0      Max.   :9.606      Max.   :57.13      Max.   :9.660  
##  
##      y_end      Fault_Type      Fault_Age      Fault_Tren  
## Min.   :55.59      Fault      :50      Pre-Quaternary: 5      NE-SW      :88  
## 1st Qu.:56.41      Major Fault :20      NA's          :83      ENE-WSW: 0  
## Median :56.55      Normal Fault:18                                N-S       : 0  
## Mean   :56.61                                           NNE-SSW: 0  
## 3rd Qu.:56.95                                           NNW-SSE: 0  
## Max.   :57.14                                           NW_SE    : 0  
##                                           (Other): 0  
##      Direction      Author  
## Min.   :-56.25      2015 GEUS Server      :14  
## 1st Qu.: -56.25      2010 Pedersen Gravesen      : 5  
## Median : -56.25      2010 Pedersen-Gravensen      : 2  
## Mean   : -56.25      2000 Veijbaek/2008 Petersen et al.: 1  
## 3rd Qu.: -56.25      2008 Veijbaek/2008 Petersen et al.: 1  
## Max.   : -56.25      2009 Veijbaek/2008 Petersen et al.: 1  
##                                           (Other)      :64
```

```
#Start by identifying the extent ("window") of the ant data
```

```
dk.owin.ants <- owin(c(min(dk.ants$x)-.05, max(dk.ants$x)+.05),  
c(min(dk.ants$y)-.05, max(dk.ants$y)+.05) )
```

```
#create a "point pattern object" out of dk.ants
```

```
dk.ppp.ants <- ppp(dk.ants$x, dk.ants$y, window=dk.owin.ants,  
marks=dk.ants$SP_ID)
```

```
#now creat a "point segment object" out of dk.faults
```

```
dk.owin.faults <- owin(c(min(dk.faults$x_start, dk.faults$x_end),  
max(dk.faults$x_start, dk.faults$x_end)), c(min(dk.faults$y_start,  
dk.faults$y_end), max(dk.faults$y_start, dk.faults$y_end)))
```

```
dk.psp.faults <- psp(dk.faults$x_start, dk.faults$y_start, dk.faults$x_end,  
dk.faults$y_end, window=dk.owin.faults)
```

```
dk.psp.faults.1 <- dk.psp.faults[dk.owin.ants]
```

```
str(dk.ppp.ants)
```

```

## List of 6
## $ window      :List of 4
## ..$ type     : chr "rectangle"
## ..$ xrange:  num [1:2] 8.16 9.08
## ..$ yrange:  num [1:2] 56.4 57.2
## ..$ units   :List of 3
## .. ..$ singular : chr "unit"
## .. ..$ plural   : chr "units"
## .. ..$ multiplier: num 1
## .. ..- attr(*, "class")= chr "units"
## ..- attr(*, "class")= chr "owin"
## $ n          : int 453
## $ x          : num [1:453] 8.21 8.21 8.22 8.23 8.23 ...
## $ y          : num [1:453] 56.5 56.4 56.5 56.6 56.5 ...
## $ markformat: chr "vector"
## $ marks      : Factor w/ 6 levels "", "fusca", "none", ...: 3 3 3 3 3 3 3 3 3
3 ...
## - attr(*, "class")= chr "ppp"

```

`str(dk.psp.faults.1)`

```

## List of 4
## $ ends        :'data.frame': 46 obs. of 4 variables:
## ..$ x0: num [1:46] 8.48 8.73 8.62 8.59 8.56 ...
## ..$ y0: num [1:46] 57.1 57.1 57.1 57.1 57.1 ...
## ..$ x1: num [1:46] 8.53 8.76 8.68 8.62 8.59 ...
## ..$ y1: num [1:46] 57.1 57.1 57.1 57.1 57.1 ...
## $ window     :List of 4
## ..$ type     : chr "rectangle"
## ..$ xrange:  num [1:2] 8.16 9.08
## ..$ yrange:  num [1:2] 56.4 57.2
## ..$ units   :List of 3
## .. ..$ singular : chr "unit"
## .. ..$ plural   : chr "units"
## .. ..$ multiplier: num 1
## .. ..- attr(*, "class")= chr "units"
## ..- attr(*, "class")= chr "owin"
## $ n          : int 46
## $ markformat: chr "none"
## - attr(*, "class")= chr [1:2] "psp" "list"

```

*#clip it*

`str(dk.owin.ants)`

```

## List of 4
## $ type       : chr "rectangle"
## $ xrange:  num [1:2] 8.16 9.08
## $ yrange:  num [1:2] 56.4 57.2
## $ units   :List of 3
## ..$ singular : chr "unit"
## ..$ plural   : chr "units"

```

```

## ..$ multiplier: num 1
## ..- attr(*, "class")= chr "units"
## - attr(*, "class")= chr "owin"

dk.owin.ants.2 <- dk.owin.ants

#Thy cLump
dk.owin.ants$yrange <- c(56.8, 57.2)
dk.owin.ants$xrange <-c(8.4, 9.08)

#Klosterhede cLump
dk.owin.ants.2$yrange <- c(56.34, 56.6)
dk.owin.ants.2$xrange <-c(8.16, 8.8)

dk.ppp.ants.2 <- dk.ppp.ants[dk.owin.ants.2]
dk.psp.faults.2 <- dk.psp.faults.1[dk.owin.ants.2]

dk.ppp.ants.2a <-unmark(dk.ppp.ants.2[dk.ppp.ants.2$marks != "none"])

dk.ppp.ants.2na <-unmark(dk.ppp.ants.2[dk.ppp.ants.2$marks == "none"])

#Let's get turn faults into a covariate that is a function of spatial
Location. A reasonable first step is the distance from any point to a fault.

cov.faults <- distmap(dk.psp.faults.2)

#relative distribution of ants to faults
#We examine how intensity of the point process (ants, no ants) varies as a
function rho of the covariate
#Because the pattern is inhomogeneous, we use a kernel smoother
plot(rhohat(dk.ppp.ants.2a, cov.faults), xlab="Distance to nearest fault",
ylim=c(0,11500), xlim=c(0,.12), main="NE-SW", col= "#e41a1c", lwd=2,
legend=F)

#test it....
rho.ants <- rhohat(dk.ppp.ants.2a, cov.faults)
rho.no.ants <- rhohat(dk.ppp.ants.2na, cov.faults)
ks.test(rho.ants$rho, rho.no.ants$rho)

## Warning in ks.test(rho.ants$rho, rho.no.ants$rho): p-value will be
## approximate in the presence of ties

##
## Two-sample Kolmogorov-Smirnov test
##
## data: rho.ants$rho and rho.no.ants$rho
## D = 0.4043, p-value < 2.2e-16
## alternative hypothesis: two-sided

```

*#strong association between normal faults and ant occurrences. Ranging from 4 to 10 m from a normal fault*

dk.faults <- read.csv("Faults\_10\_26.csv", header=T) *#this is the file for geological faults*

summary (dk.faults)

```
##           Id           x_start           y_start           x_end
## Min.      :0      Min.      : 7.711      Min.      :55.43      Min.      : 7.635
## 1st Qu.:0      1st Qu.: 8.552      1st Qu.:56.41      1st Qu.: 8.583
## Median :0      Median : 8.969      Median :56.77      Median : 9.013
## Mean    :0      Mean    : 9.071      Mean    :56.74      Mean    : 9.106
## 3rd Qu.:0      3rd Qu.: 9.483      3rd Qu.:57.07      3rd Qu.: 9.529
## Max.    :0      Max.    :10.973     Max.    :57.90      Max.    :10.950
##
##           y_end           Fault_Type           Fault_Age           Fault_Tren
## Min.      :55.44      Fault           :215      Pre-Quaternary: 38      NW-SE :228
## 1st Qu.:56.40      Major Fault :238      NA's           :564      WNW-ESE:140
## Median :56.74      Normal Fault:149
## Mean    :56.73
## 3rd Qu.:57.05
## Max.    :57.90
##
##           Direction           Author
## Min.      :-348.8      2015 GEUS Server           :179
## 1st Qu.: -326.2      2010 Pedersen-Gravensen     : 54
## Median : -326.2      2010 Pedersen Gravesen      : 38
## Mean    : -261.6      1997 Veijbaek/2008 Petersen et al.: 1
## 3rd Qu.: -303.8      1998 Veijbaek/2008 Petersen et al.: 1
## Max.    :    0.0      1999 Veijbaek/2008 Petersen et al.: 1
##
##                               (Other)           :328
```

*#subset this dataset to include only normal faults*

dk.faults<-dk.faults[**which**(dk.faults\$Fault\_Tren ==**"NNE-SSW"**),]  
summary(dk.faults)

```
##           Id           x_start           y_start           x_end
## Min.      :0      Min.      :7.742      Min.      :55.54      Min.      :7.763
## 1st Qu.:0      1st Qu.:8.962      1st Qu.:56.36      1st Qu.:8.964
## Median :0      Median :9.195      Median :56.68      Median :9.192
## Mean    :0      Mean    :9.157      Mean    :56.52      Mean    :9.154
## 3rd Qu.:0      3rd Qu.:9.440      3rd Qu.:56.82      3rd Qu.:9.436
## Max.    :0      Max.    :9.777      Max.    :57.07      Max.    :9.734
##
##           y_end           Fault_Type           Fault_Age           Fault_Tren
## Min.      :55.44      Fault           :18      Pre-Quaternary: 0      NNE-SSW:40
## 1st Qu.:56.41      Major Fault : 1      NA's           :40      ENE-WSW: 0
## Median :56.67      Normal Fault:21
## Mean    :56.50
## 3rd Qu.:56.78
## Max.    :57.06
##
##                               N-S           : 0
##                               NE-SW        : 0
##                               NNW-SSE     : 0
##                               NW_SE       : 0
```

```

##                                     (Other): 0
##   Direction                          Author
##   Min.    :-33.75    2010 Pedersen-Gravensen      : 3
##   1st Qu. :-33.75    2001 Veijbaek/2008 Petersen et al.: 1
##   Median  :-33.75    2007 Veijbaek/2008 Petersen et al.: 1
##   Mean    :-33.75    2015 GEUS Server              : 1
##   3rd Qu. :-33.75    2016 Veijbaek/2008 Petersen et al.: 1
##   Max.    :-33.75    2018 Veijbaek/2008 Petersen et al.: 1
##                                     (Other)         :32

#Start by identifying the extent ("window") of the ant data
dk.owin.ants <- owin(c(min(dk.ants$x)-.05, max(dk.ants$x)+.05),
c(min(dk.ants$y)-.05, max(dk.ants$y)+.05) )

#create a "point pattern object" out of dk.ants
dk.ppp.ants <- ppp(dk.ants$x, dk.ants$y, window=dk.owin.ants,
marks=dk.ants$SP_ID)

#now creat a "point segment object" out of dk.faults
dk.owin.faults <- owin(c(min(dk.faults$x_start, dk.faults$x_end),
max(dk.faults$x_start, dk.faults$x_end)), c(min(dk.faults$y_start,
dk.faults$y_end), max(dk.faults$y_start, dk.faults$y_end)))

dk.psp.faults <- psp(dk.faults$x_start, dk.faults$y_start, dk.faults$x_end,
dk.faults$y_end, window=dk.owin.faults)

dk.psp.faults.1 <- dk.psp.faults[dk.owin.ants]

str(dk.ppp.ants)

## List of 6
## $ window      :List of 4
## ..$ type      : chr "rectangle"
## ..$ xrange: num [1:2] 8.16 9.08
## ..$ yrange: num [1:2] 56.4 57.2
## ..$ units :List of 3
## .. ..$ singular : chr "unit"
## .. ..$ plural   : chr "units"
## .. ..$ multiplier: num 1
## .. ..- attr(*, "class")= chr "units"
## ..- attr(*, "class")= chr "owin"
## $ n           : int 453
## $ x           : num [1:453] 8.21 8.21 8.22 8.23 8.23 ...
## $ y           : num [1:453] 56.5 56.4 56.5 56.6 56.5 ...
## $ markformat: chr "vector"
## $ marks       : Factor w/ 6 levels "", "fusca", "none", ...: 3 3 3 3 3 3 3 3 3
3 ...
## - attr(*, "class")= chr "ppp"

str(dk.psp.faults.1)

```



```

## List of 4
## $ ends      :'data.frame': 10 obs. of 4 variables:
## ..$ x0: num [1:10] 8.72 8.93 8.9 9.03 9 ...
## ..$ y0: num [1:10] 57.1 57 56.8 56.7 56.7 ...
## ..$ x1: num [1:10] 8.71 8.91 8.88 9.03 9.03 ...
## ..$ y1: num [1:10] 57.1 56.9 56.8 56.7 56.7 ...
## $ window    :List of 4
## ..$ type    : chr "rectangle"
## ..$ xrange: num [1:2] 8.16 9.08
## ..$ yrange: num [1:2] 56.4 57.2
## ..$ units   :List of 3
## .. ..$ singular : chr "unit"
## .. ..$ plural   : chr "units"
## .. ..$ multiplier: num 1
## .. ..- attr(*, "class")= chr "units"
## ..- attr(*, "class")= chr "owin"
## $ n         : int 10
## $ markformat: chr "none"
## - attr(*, "class")= chr [1:2] "psp" "list"

```

```

#clip it
str(dk.owin.ants)

```

```

## List of 4
## $ type    : chr "rectangle"
## $ xrange: num [1:2] 8.16 9.08
## $ yrange: num [1:2] 56.4 57.2
## $ units   :List of 3
## ..$ singular : chr "unit"
## ..$ plural   : chr "units"
## ..$ multiplier: num 1
## ..- attr(*, "class")= chr "units"
## - attr(*, "class")= chr "owin"

```

```

dk.owin.ants.2 <- dk.owin.ants

```

```

#Thy clump

```

```

dk.owin.ants$yrange <- c(56.8, 57.2)
dk.owin.ants$xrange <-c(8.4, 9.08)

```

```

#Klosterhede clump

```

```

dk.owin.ants.2$yrange <- c(56.34, 56.6)
dk.owin.ants.2$xrange <-c(8.16, 8.8)

```

```

dk.ppp.ants.2 <- dk.ppp.ants[dk.owin.ants.2]
dk.psp.faults.2 <- dk.psp.faults.1[dk.owin.ants.2]

```

```

dk.ppp.ants.2a <-unmark(dk.ppp.ants.2[dk.ppp.ants.2$marks != "none"])

```

```

dk.ppp.ants.2na <-unmark(dk.ppp.ants.2[dk.ppp.ants.2$marks == "none"])

```

*#Let's get turn faults into a covariate that is a function of spatial location. A reasonable first step is the distance from any point to a fault.*

```
cov.faults <- distmap(dk.psp.faults.2)
```

*#relative distribution of ants to faults*

*#We examine how intensity of the point process (ants, no ants) varies as a function rho of the covariate*

*#Because the pattern is inhomogeneous, we use a kernel smoother*

```
plot(rhohat(dk.ppp.ants.2a, cov.faults), xlab="Distance to nearest fault",  
ylim=c(0,11500), xlim=c(0,.12), main="NNE-SSW", col= "#e41a1c", lwd=2,  
legend=F)
```

*#test it....*

```
rho.ants <- rhohat(dk.ppp.ants.2a, cov.faults)
```

```
rho.no.ants <- rhohat(dk.ppp.ants.2na, cov.faults)
```

```
ks.test(rho.ants$rho, rho.no.ants$rho)
```

```
## Warning in ks.test(rho.ants$rho, rho.no.ants$rho): p-value will be  
## approximate in the presence of ties
```

```
##
```

```
## Two-sample Kolmogorov-Smirnov test
```

```
##
```

```
## data: rho.ants$rho and rho.no.ants$rho
```

```
## D = 0.73242, p-value < 2.2e-16
```

```
## alternative hypothesis: two-sided
```

*#strong association between normal faults and ant occurances. Ranging from 4 to 10 m from a normal fault*

```
dk.faults <- read.csv("Faults_10_26.csv", header=T) #this is the file for geological faults
```

```
summary (dk.faults)
```

```
##           Id           x_start           y_start           x_end  
## Min.      :0      Min.      : 7.711      Min.      :55.43      Min.      : 7.635  
## 1st Qu.:0      1st Qu.: 8.552      1st Qu.:56.41      1st Qu.: 8.583  
## Median :0      Median : 8.969      Median :56.77      Median : 9.013  
## Mean    :0      Mean    : 9.071      Mean     :56.74      Mean     : 9.106  
## 3rd Qu.:0      3rd Qu.: 9.483      3rd Qu.:57.07      3rd Qu.: 9.529  
## Max.    :0      Max.    :10.973     Max.     :57.90      Max.     :10.950
```

```
##
```

```
##           y_end           Fault_Type           Fault_Age           Fault_Tren  
## Min.      :55.44      Fault           :215      Pre-Quaternary: 38      NW-SE      :228  
## 1st Qu.:56.40      Major Fault    :238      NA's           :564      WNW-ESE:140  
## Median :56.74      Normal Fault:149  
## Mean    :56.73  
## 3rd Qu.:57.05  
## Max.    :57.90  
## ENE-WSW: 7
```

```
## (Other): 6
## Direction Author
## Min. :-348.8 2015 GEUS Server :179
## 1st Qu.: -326.2 2010 Pedersen-Gravensen : 54
## Median :-326.2 2010 Pedersen Gravesen : 38
## Mean :-261.6 1997 Veijbaek/2008 Petersen et al.: 1
## 3rd Qu.: -303.8 1998 Veijbaek/2008 Petersen et al.: 1
## Max. : 0.0 1999 Veijbaek/2008 Petersen et al.: 1
## (Other) :328
```

*#subset this dataset to include only normal faults*

```
dk.faults<-dk.faults[which(dk.faults$Fault_Tren == "WNW-ESE"),]
summary(dk.faults)
```

```
## Id x_start y_start x_end
## Min. :0 Min. : 7.742 Min. :55.54 Min. : 7.941
## 1st Qu.:0 1st Qu.: 8.843 1st Qu.:56.44 1st Qu.: 8.875
## Median :0 Median : 9.321 Median :57.04 Median : 9.420
## Mean :0 Mean : 9.433 Mean :56.89 Mean : 9.508
## 3rd Qu.:0 3rd Qu.:10.074 3rd Qu.:57.24 3rd Qu.:10.153
## Max. :0 Max. :10.973 Max. :57.89 Max. :10.940
##
## y_end Fault_Type Fault_Age Fault_Tren
## Min. :55.53 Fault :55 Pre-Quaternary: 0 WNW-ESE:140
## 1st Qu.:56.43 Major Fault :46 NA's :140 ENE-WSW: 0
## Median :57.01 Normal Fault:39 N-S : 0
## Mean :56.87 NE-SW : 0
## 3rd Qu.:57.22 NNE-SSW: 0
## Max. :57.90 NNW-SSE: 0
## (Other): 0
## Direction Author
## Min. :-303.8 2015 GEUS Server :41
## 1st Qu.: -303.8 2010 Pedersen-Gravensen :22
## Median :-303.8 2004 Veijbaek/2008 Petersen et al.: 1
## Mean :-303.8 2005 Veijbaek/2008 Petersen et al.: 1
## 3rd Qu.: -303.8 2015 Veijbaek/2008 Petersen et al.: 1
## Max. :-303.8 2021 Veijbaek/2008 Petersen et al.: 1
## (Other) :73
```

*#Start by identifying the extent ("window") of the ant data*

```
dk.owin.ants <- owin(c(min(dk.ants$x)-.05, max(dk.ants$x)+.05),
c(min(dk.ants$y)-.05, max(dk.ants$y)+.05) )
```

*#create a "point pattern object" out of dk.ants*

```
dk.ppp.ants <- ppp(dk.ants$x, dk.ants$y, window=dk.owin.ants,
marks=dk.ants$SP_ID)
```

*#now creat a "point segment object" out of dk.faults*

```
dk.owin.faults <- owin(c(min(dk.faults$x_start, dk.faults$x_end),
max(dk.faults$x_start, dk.faults$x_end)), c(min(dk.faults$y_start,
```

```

dk.faults$y_end),    max(dk.faults$y_start, dk.faults$y_end)))

dk.psp.faults <- psp(dk.faults$x_start, dk.faults$y_start, dk.faults$x_end,
dk.faults$y_end, window=dk.owin.faults)

dk.psp.faults.1 <- dk.psp.faults[dk.owin.ants]

str(dk.ppp.ants)

## List of 6
## $ window      :List of 4
## ..$ type      : chr "rectangle"
## ..$ xrange: num [1:2] 8.16 9.08
## ..$ yrange: num [1:2] 56.4 57.2
## ..$ units :List of 3
## .. ..$ singular : chr "unit"
## .. ..$ plural    : chr "units"
## .. ..$ multiplier: num 1
## .. ..- attr(*, "class")= chr "units"
## ..- attr(*, "class")= chr "owin"
## $ n           : int 453
## $ x           : num [1:453] 8.21 8.21 8.22 8.23 8.23 ...
## $ y           : num [1:453] 56.5 56.4 56.5 56.6 56.5 ...
## $ markformat: chr "vector"
## $ marks       : Factor w/ 6 levels "", "fusca", "none", ...: 3 3 3 3 3 3 3 3 3
3 ...
## - attr(*, "class")= chr "ppp"

str(dk.psp.faults.1)

## List of 4
## $ ends        :'data.frame': 22 obs. of 4 variables:
## ..$ x0: num [1:22] 8.81 8.92 8.96 8.99 9.01 ...
## ..$ y0: num [1:22] 56.4 57 57.2 57.2 57.2 ...
## ..$ x1: num [1:22] 8.85 8.98 8.99 9.01 9.02 ...
## ..$ y1: num [1:22] 56.4 56.9 57.2 57.2 57.2 ...
## $ window      :List of 4
## ..$ type      : chr "rectangle"
## ..$ xrange: num [1:2] 8.16 9.08
## ..$ yrange: num [1:2] 56.4 57.2
## ..$ units :List of 3
## .. ..$ singular : chr "unit"
## .. ..$ plural    : chr "units"
## .. ..$ multiplier: num 1
## .. ..- attr(*, "class")= chr "units"
## ..- attr(*, "class")= chr "owin"
## $ n           : int 22
## $ markformat: chr "none"
## - attr(*, "class")= chr [1:2] "psp" "list"

```

```

#clip it
str(dk.owin.ants)

## List of 4
## $ type : chr "rectangle"
## $ xrange: num [1:2] 8.16 9.08
## $ yrange: num [1:2] 56.4 57.2
## $ units :List of 3
## ..$ singular : chr "unit"
## ..$ plural : chr "units"
## ..$ multiplier: num 1
## ..- attr(*, "class")= chr "units"
## - attr(*, "class")= chr "owin"

dk.owin.ants.2 <- dk.owin.ants

#Thy cLump
dk.owin.ants$yrange <- c(56.8, 57.2)
dk.owin.ants$xrange <-c(8.4, 9.08)

#Klosterhede cLump
dk.owin.ants.2$yrange <- c(56.34, 56.6)
dk.owin.ants.2$xrange <-c(8.16, 8.8)

dk.ppp.ants.2 <- dk.ppp.ants[dk.owin.ants.2]
dk.psp.faults.2 <- dk.psp.faults.1[dk.owin.ants.2]

dk.ppp.ants.2a <-unmark(dk.ppp.ants.2[dk.ppp.ants.2$marks != "none"])

dk.ppp.ants.2na <-unmark(dk.ppp.ants.2[dk.ppp.ants.2$marks == "none"])

#Let's get turn faults into a covariate that is a function of spatial
location. A reasonable first step is the distance from any point to a fault.

cov.faults <- distmap(dk.psp.faults.2)

#relative distribution of ants to faults
#We examine how intensity of the point process (ants, no ants) varies as a
function rho of the covariate
#Because the pattern is inhomogeneous, we use a kernel smoother
plot(rhohat(dk.ppp.ants.2a, cov.faults), xlab="Distance to nearest fault",
ylim=c(0,11500), xlim=c(0,.12), main="WNW-ESE", col= "#e41a1c", lwd=2,
legend=F)

```

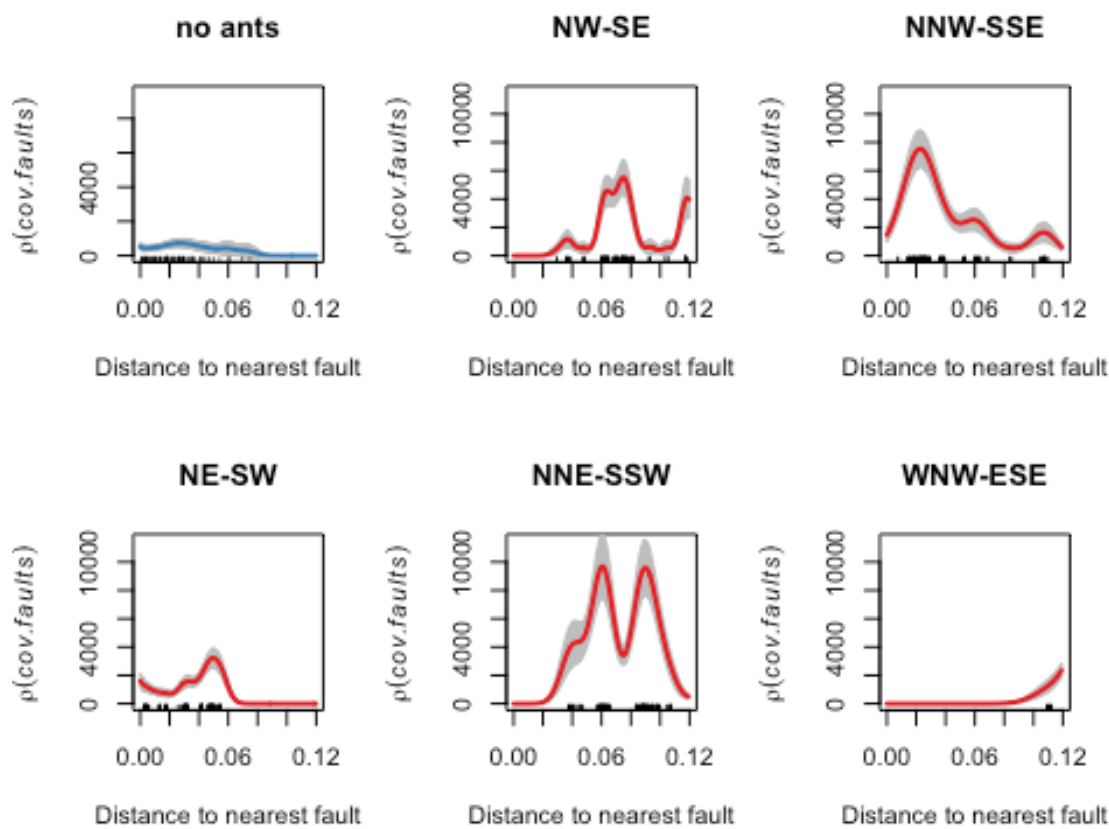

```
#test it....
rho.ants <- rhohat(dk.ppp.ants.2a, cov.faults)
rho.no.ants <- rhohat(dk.ppp.ants.2na, cov.faults)
ks.test(rho.ants$rho, rho.no.ants$rho)

## Warning in ks.test(rho.ants$rho, rho.no.ants$rho): p-value will be
## approximate in the presence of ties

##
## Two-sample Kolmogorov-Smirnov test
##
## data: rho.ants$rho and rho.no.ants$rho
## D = 0.58594, p-value < 2.2e-16
## alternative hypothesis: two-sided
```

In response to reviewer concerns, we now include an additional analysis of spatial clustering at the scale of the grid cell and not the ant mound. This analysis addresses the question: "Does regional nest spatial clustering associate with the presenece of tectonic faults?"

```
#subset the dataset to show only the plots with ants (presence/absence)
sites<-read.csv('dk_sites.csv')
sites<- sites[which (sites$PA=="1"),]
```

```

#### Now lets consider the directionality of the faults
#Lets consider major faults
dk.faults <- read.csv("Faults_10_26.csv", header=T) #this is the file for
geological faults

#Start by identifying the extent ("window") of the ant data
dk.owin.ants <- owin(c(min(sites$x)-.05, max(sites$x)+.05), c(min(sites$y)-
.05, max(sites$y)+.05) )

#create a "point pattern object" out of dk.ants
dk.ppp.ants <- ppp(sites$x, sites$y, window=dk.owin.ants, marks=sites$PA)

#now creat a "point segment object" out of dk.faults
dk.owin.faults <- owin(c(min(dk.faults$x_start, dk.faults$x_end),
max(dk.faults$x_start, dk.faults$x_end)), c(min(dk.faults$y_start,
dk.faults$y_end), max(dk.faults$y_start, dk.faults$y_end)))

dk.psp.faults <- psp(dk.faults$x_start, dk.faults$y_start, dk.faults$x_end,
dk.faults$y_end, window=dk.owin.faults)

dk.psp.faults.1 <- dk.psp.faults[dk.owin.ants]

str(dk.ppp.ants)

## List of 6
## $ window      :List of 4
## ..$ type      : chr "rectangle"
## ..$ xrange: num [1:2] 8.26 9.08
## ..$ yrange: num [1:2] 56.4 57.2
## ..$ units :List of 3
## .. ..$ singular : chr "unit"
## .. ..$ plural    : chr "units"
## .. ..$ multiplier: num 1
## .. ..- attr(*, "class")= chr "units"
## ..- attr(*, "class")= chr "owin"
## $ n           : int 31
## $ x           : num [1:31] 8.88 9.03 8.96 8.97 8.99 ...
## $ y           : num [1:31] 57 57 57.1 57.1 57.1 ...
## $ markformat: chr "vector"
## $ marks       : int [1:31] 1 1 1 1 1 1 1 1 1 1 ...
## - attr(*, "class")= chr "ppp"

str(dk.psp.faults.1)

## List of 4
## $ ends        :'data.frame': 166 obs. of 4 variables:
## ..$ x0: num [1:166] 8.37 8.54 8.81 8.48 8.72 ...
## ..$ y0: num [1:166] 56.6 56.4 56.4 57.1 57.1 ...
## ..$ x1: num [1:166] 8.38 8.56 8.85 8.53 8.71 ...
## ..$ y1: num [1:166] 56.5 56.4 56.4 57.1 57.1 ...

```

```

## $ window      :List of 4
## ..$ type     : chr "rectangle"
## ..$ xrange:  num [1:2] 8.26 9.08
## ..$ yrange:  num [1:2] 56.4 57.2
## ..$ units   :List of 3
## ...$ singular : chr "unit"
## ...$ plural   : chr "units"
## ...$ multiplier: num 1
## ...- attr(*, "class")= chr "units"
## ..- attr(*, "class")= chr "owin"
## $ n          : int 166
## $ markformat: chr "none"
## - attr(*, "class")= chr [1:2] "psp" "list"

```

```

#clip it
str(dk.owin.ants)

```

```

## List of 4
## $ type     : chr "rectangle"
## $ xrange:  num [1:2] 8.26 9.08
## $ yrange:  num [1:2] 56.4 57.2
## $ units   :List of 3
## ..$ singular : chr "unit"
## ..$ plural   : chr "units"
## ..$ multiplier: num 1
## ...- attr(*, "class")= chr "units"
## - attr(*, "class")= chr "owin"

```

```

dk.owin.ants.2 <- dk.owin.ants

```

```

#Thy clump
dk.owin.ants$yrange <- c(56.8, 57.2)
dk.owin.ants$xrange <-c(8.4, 9.08)

```

```

#Klosterhede clump
dk.owin.ants.2$yrange <- c(56.34, 56.6)
dk.owin.ants.2$xrange <-c(8.16, 8.8)

```

```

dk.ppp.ants.2 <- dk.ppp.ants[dk.owin.ants.2]
dk.psp.faults.2 <- dk.psp.faults.1[dk.owin.ants.2]

```

```

dk.ppp.ants.2a <-unmark(dk.ppp.ants.2[dk.ppp.ants.2$marks != "none"])

```

```

dk.ppp.ants.2na <-unmark(dk.ppp.ants.2[dk.ppp.ants.2$marks == "none"])

```

*#Let's get turn faults into a covariate that is a function of spatial location. A reasonable first step is the distance from any point to a fault.*

```

cov.faults <- distmap(dk.psp.faults.2)

```



```

#relative distribution of ants to faults
#We examine how intensity of the point process (ants, no ants) varies as a
function rho of the covariate
#Because the pattern is inhomogeneous, we use a kernel smoother
plot(rhohat(dk.ppp.ants.2a, cov.faults), xlab="Distance to nearest fault",
ylim=c(0,400), xlim=c(0,.12), main="Grid- Level Analyses", col= "#e41a1c",
lwd=2, legend=T)

```

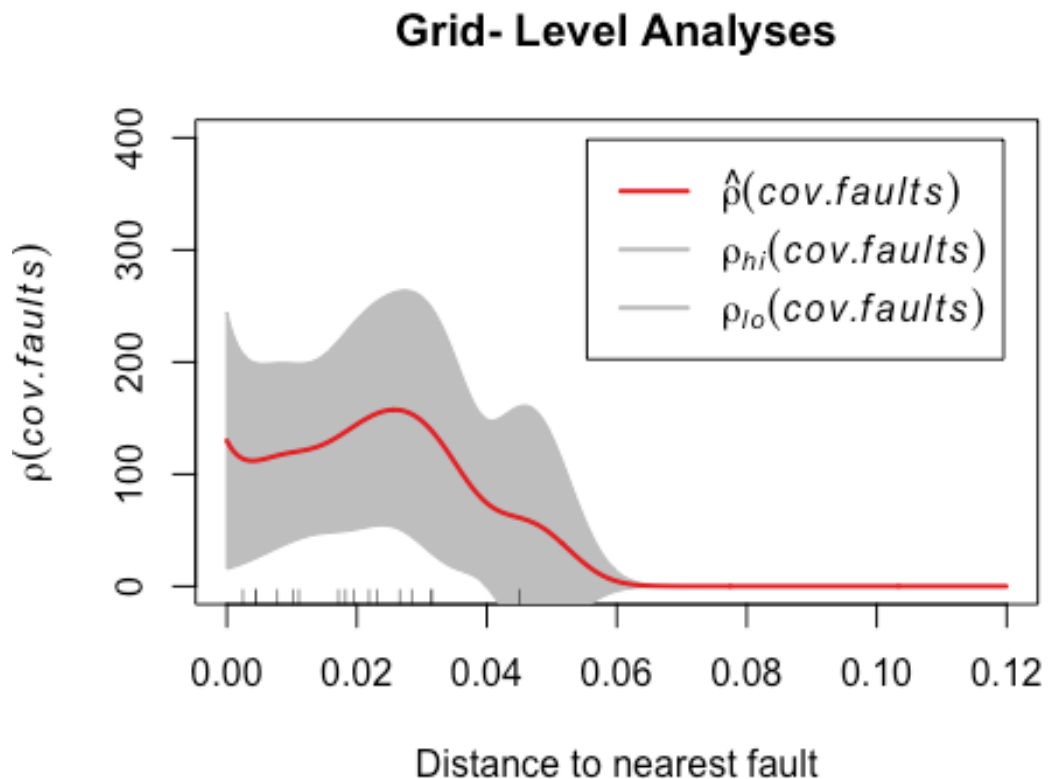

```

#test it....
rho.ants <- rhohat(dk.ppp.ants.2a, cov.faults)
ks.test(rho.ants$rho, rho.no.ants$rho)

## Warning in ks.test(rho.ants$rho, rho.no.ants$rho): p-value will be
## approximate in the presence of ties

##
## Two-sample Kolmogorov-Smirnov test
##
## data: rho.ants$rho and rho.no.ants$rho
## D = 0.91016, p-value < 2.2e-16
## alternative hypothesis: two-sided

# a test of the rufa vs polychtena effect: Question: Does the spatial pattern
between F.rufa and F. polychtena differ?

```

```

setwd("/Users/israel/Desktop/OneDrive - Lawrence University/DK Ants")
rufa<-dk.ants[which(dk.ants$SP_ID=="rufa"),]
par(mfrow=c(1,1))

#### Now lets consider the directionality of the faults
#Lets consider major faults
dk.faults <- read.csv("Faults_10_26.csv", header=T) #this is the file for
geological faults

#Start by identifying the extent ("window") of the ant data
dk.owin.ants <- owin(c(min(rufa$x)-.05, max(rufa$x)+.05), c(min(rufa$y)-.05,
max(rufa$y)+.05) )

#create a "point pattern object" out of dk.ants
dk.ppp.ants <- ppp(rufa$x, rufa$y, window=dk.owin.ants, marks=rufa$SP_ID)

#now creat a "point segment object" out of dk.faults
dk.owin.faults <- owin(c(min(dk.faults$x_start, dk.faults$x_end),
max(dk.faults$x_start, dk.faults$x_end)), c(min(dk.faults$y_start,
dk.faults$y_end), max(dk.faults$y_start, dk.faults$y_end)))

dk.psp.faults <- psp(dk.faults$x_start, dk.faults$y_start, dk.faults$x_end,
dk.faults$y_end, window=dk.owin.faults)

dk.psp.faults.1 <- dk.psp.faults[dk.owin.ants]

str(dk.ppp.ants)

## List of 6
## $ window      :List of 4
## ..$ type      : chr "rectangle"
## ..$ xrange:    num [1:2] 8.26 9.08
## ..$ yrange:    num [1:2] 56.4 57.1
## ..$ units     :List of 3
## .. ..$ singular : chr "unit"
## .. ..$ plural   : chr "units"
## .. ..$ multiplier: num 1
## .. ..- attr(*, "class")= chr "units"
## ..- attr(*, "class")= chr "owin"
## $ n           : int 34
## $ x           : num [1:34] 8.31 8.31 8.31 8.32 8.32 ...
## $ y           : num [1:34] 56.5 56.5 56.5 56.5 56.5 ...
## $ markformat: chr "vector"
## $ marks       : Factor w/ 6 levels "", "fusca", "none",...: 5 5 5 5 5 5 5 5 5
5 ...
## - attr(*, "class")= chr "ppp"

str(dk.psp.faults.1)

```

```

## List of 4
## $ ends      :'data.frame': 159 obs. of 4 variables:
## ..$ x0: num [1:159] 8.37 8.54 8.81 8.48 8.72 ...
## ..$ y0: num [1:159] 56.6 56.4 56.4 57.1 57.1 ...
## ..$ x1: num [1:159] 8.38 8.56 8.85 8.53 8.71 ...
## ..$ y1: num [1:159] 56.5 56.4 56.4 57.1 57.1 ...
## $ window    :List of 4
## ..$ type    : chr "rectangle"
## ..$ xrange: num [1:2] 8.26 9.08
## ..$ yrange: num [1:2] 56.4 57.1
## ..$ units   :List of 3
## .. ..$ singular : chr "unit"
## .. ..$ plural    : chr "units"
## .. ..$ multiplier: num 1
## .. ..- attr(*, "class")= chr "units"
## ..- attr(*, "class")= chr "owin"
## $ n          : int 159
## $ markformat: chr "none"
## - attr(*, "class")= chr [1:2] "psp" "list"

```

```

#clip it
str(dk.owin.ants)

```

```

## List of 4
## $ type    : chr "rectangle"
## $ xrange: num [1:2] 8.26 9.08
## $ yrange: num [1:2] 56.4 57.1
## $ units   :List of 3
## ..$ singular : chr "unit"
## ..$ plural    : chr "units"
## ..$ multiplier: num 1
## ..- attr(*, "class")= chr "units"
## - attr(*, "class")= chr "owin"

```

```

dk.owin.ants.2 <- dk.owin.ants

```

```

#Thy clump

```

```

dk.owin.ants$yrange <- c(56.8, 57.2)
dk.owin.ants$xrange <-c(8.4, 9.08)

```

```

#Klosterhede clump

```

```

dk.owin.ants.2$yrange <- c(56.34, 56.6)
dk.owin.ants.2$xrange <-c(8.16, 8.8)

```

```

dk.ppp.ants.2 <- dk.ppp.ants[dk.owin.ants.2]
dk.psp.faults.2 <- dk.psp.faults.1[dk.owin.ants.2]

```

```

dk.ppp.ants.2b <-unmark(dk.ppp.ants.2[dk.ppp.ants.2$marks != "none"])

```

```

dk.ppp.ants.2na <-unmark(dk.ppp.ants.2[dk.ppp.ants.2$marks == "none"])

```

*#Let's get turn faults into a covariate that is a function of spatial location. A reasonable first step is the distance from any point to a fault.*

```
cov.faults <- distmap(dk.psp.faults.2)
```

*#relative distribution of ants to faults*

*#We examine how intensity of the point process (ants, no ants) varies as a function rho of the covariate*

*#Because the pattern is inhomogeneous, we use a kernel smoother*

```
plot(rhohat(dk.ppp.ants.2b, cov.faults), xlab="Distance to nearest fault",  
ylim=c(0,1000), xlim=c(0,.12), main="F. rufa", col= "#e41a1c", lwd=2,  
legend=T)
```

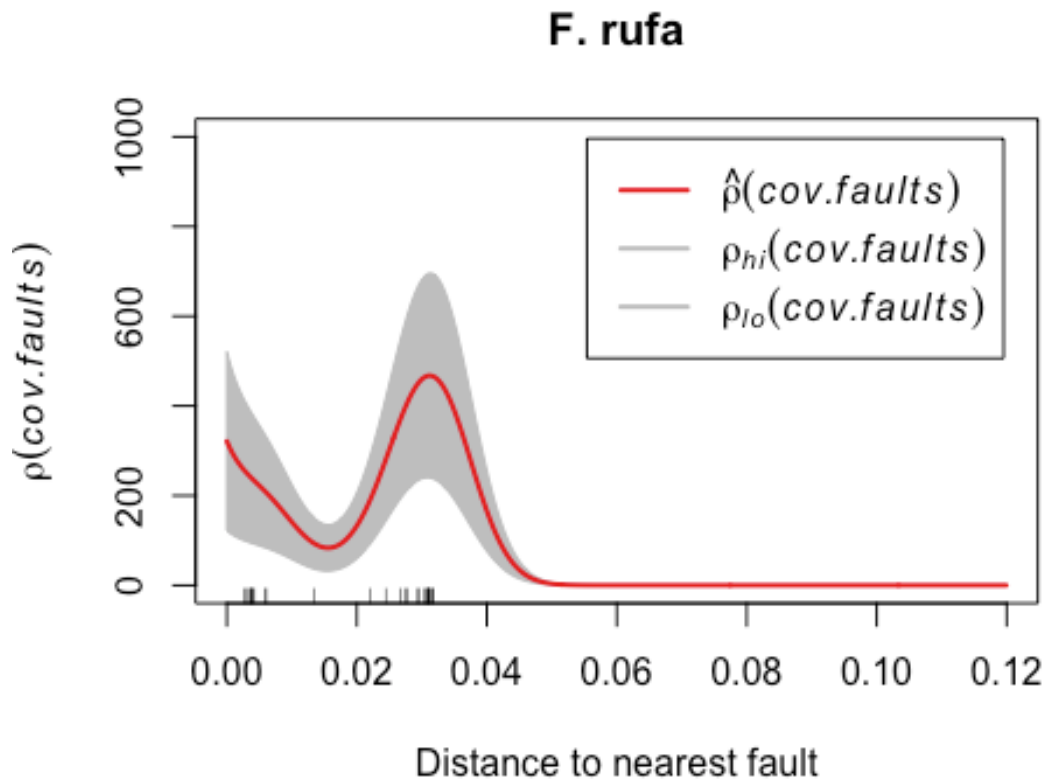

*#test it....*

```
rho.ants <- rhohat(dk.ppp.ants.2a, cov.faults)
```

```
ks.test(rho.ants$rho, rho.no.ants$rho)
```

```
## Warning in ks.test(rho.ants$rho, rho.no.ants$rho): p-value will be  
## approximate in the presence of ties
```

```
##
```

```
## Two-sample Kolmogorov-Smirnov test
```

```
##  
## data: rho.ants$rho and rho.no.ants$rho  
## D = 0.91016, p-value < 2.2e-16  
## alternative hypothesis: two-sided
```
